# Supplementary material for: Bipolenins K–N: New sesquiterpenoids from the fungal plant pathogen Bipolaris sorokiniana
Source: publisher site journal article supplement (doi:10.3762/bjoc.15.198), 2019-08-26
Supplement: Additional file 1 [file 1860-5397-15-198-S1.pdf]

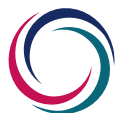

## Supporting Information

for

### **Bipolenins K–N: New sesquiterpenoids from the fungal plant pathogen *Bipolaris sorokiniana***

Chin-Soon Phan, Hang Li, Simon Kessler, Peter S. Solomon, Andrew M. Piggott and Yit-Heng Chooi

*Beilstein J. Org. Chem.* **2019**, *15*, 2020–2028. doi:10.3762/bjoc.15.198

### **NMR, IR and MS spectra of compounds 1–4**

## Contents

**Figure S1:**  $^1\text{H}$  NMR spectrum (500 MHz) of **1** in  $\text{CD}_3\text{OD}$

**Figure S2:**  $^{13}\text{C}$  NMR spectrum (125 MHz) of **1** in  $\text{CD}_3\text{OD}$

**Figure S3:** HSQC spectrum (500 MHz) of **1** in  $\text{CD}_3\text{OD}$

**Figure S4:** HMBC spectrum (500 MHz) of **1** in  $\text{CD}_3\text{OD}$

**Figure S5:**  $^1\text{H}$ - $^1\text{H}$  COSY spectrum (500 MHz) of **1** in  $\text{CD}_3\text{OD}$

**Figure S6:** NOESY spectrum (500 MHz) of **1** in  $\text{CD}_3\text{OD}$

**Figure S7:** HRESIMS spectrum of **1**

**Figure S8:** ESIMS spectrum of **1**

**Figure S9:** IR spectrum of **1**

**Figure S10:**  $^1\text{H}$  NMR spectrum (600 MHz) of **2** in  $\text{CD}_3\text{OD}$

**Figure S11:**  $^{13}\text{C}$  NMR spectrum (150 MHz) of **2** in  $\text{CD}_3\text{OD}$

**Figure S12:** HSQC spectrum (600 MHz) of **2** in  $\text{CD}_3\text{OD}$

**Figure S13:** HMBC spectrum (600 MHz) of **2** in  $\text{CD}_3\text{OD}$

**Figure S14:**  $^1\text{H}$ - $^1\text{H}$  COSY spectrum (600 MHz) of **2** in  $\text{CD}_3\text{OD}$

**Figure S15:** NOESY spectrum (600 MHz) of **2** in  $\text{CD}_3\text{OD}$

**Figure S16:** HRESIMS spectrum of **2**

**Figure S17:** ESIMS spectrum of **2**

**Figure S18:** IR spectrum of **2**

**Figure S19:**  $^1\text{H}$  NMR spectrum (600 MHz) of **3** in  $\text{CD}_3\text{OD}$

**Figure S20:**  $^{13}\text{C}$  NMR spectrum (150 MHz) of **3** in  $\text{CD}_3\text{OD}$

**Figure S21:** HSQC spectrum (600 MHz) of **3** in  $\text{CD}_3\text{OD}$

**Figure S22:** HMBC spectrum (600 MHz) of **3** in  $\text{CD}_3\text{OD}$

**Figure S23:**  $^1\text{H}$ - $^1\text{H}$  COSY spectrum (600 MHz) of **3** in  $\text{CD}_3\text{OD}$

**Figure S24:** NOESY spectrum (600 MHz) of **3** in  $\text{CD}_3\text{OD}$

**Figure S25:** HRESIMS spectrum of **3**

**Figure S26:** ESIMS spectrum of **3**

**Figure S27:** IR spectrum of **3**

**Figure S28:**  $^1\text{H}$  NMR spectrum (600 MHz) of **4** in  $\text{CDCl}_3$

**Figure S29:**  $^{13}\text{C}$  NMR spectrum (150 MHz) of **4** in  $\text{CDCl}_3$

**Figure S30:** HSQC spectrum (600 MHz) of **4** in  $\text{CDCl}_3$

**Figure S31:** HMBC spectrum (600 MHz) of **4** in  $\text{CDCl}_3$

**Figure S32:**  $^1\text{H}$ - $^1\text{H}$  COSY spectrum (600 MHz) of **4** in  $\text{CDCl}_3$

**Figure S33:** NOESY spectrum (600 MHz) of **4** in  $\text{CDCl}_3$

**Figure S34:** HRESIMS spectrum of **4**

**Figure S35:** ESIMS spectrum of **4**

**Figure S36:** IR spectrum of **4**

**Figure S37:** UV-vis spectrum of **1–3** and **5**

**Figure S38:** ECD spectrum of **4**

**Figure S39:** Phytotoxic activity of **1–12** against wheat leaves at 200 ppm

**Figure S40:** Phytotoxic activity of **1–10** and **12** against wheat leaves at 500 ppm

**Figure S41:** Phytotoxic activity of **1**, **6–10** and **12** against wheat germination at 100 ppm on day 5

**Figure S42:** Phytotoxic activity of **1**, **6–10** and **12** against wheat germination at 100 ppm on day 7

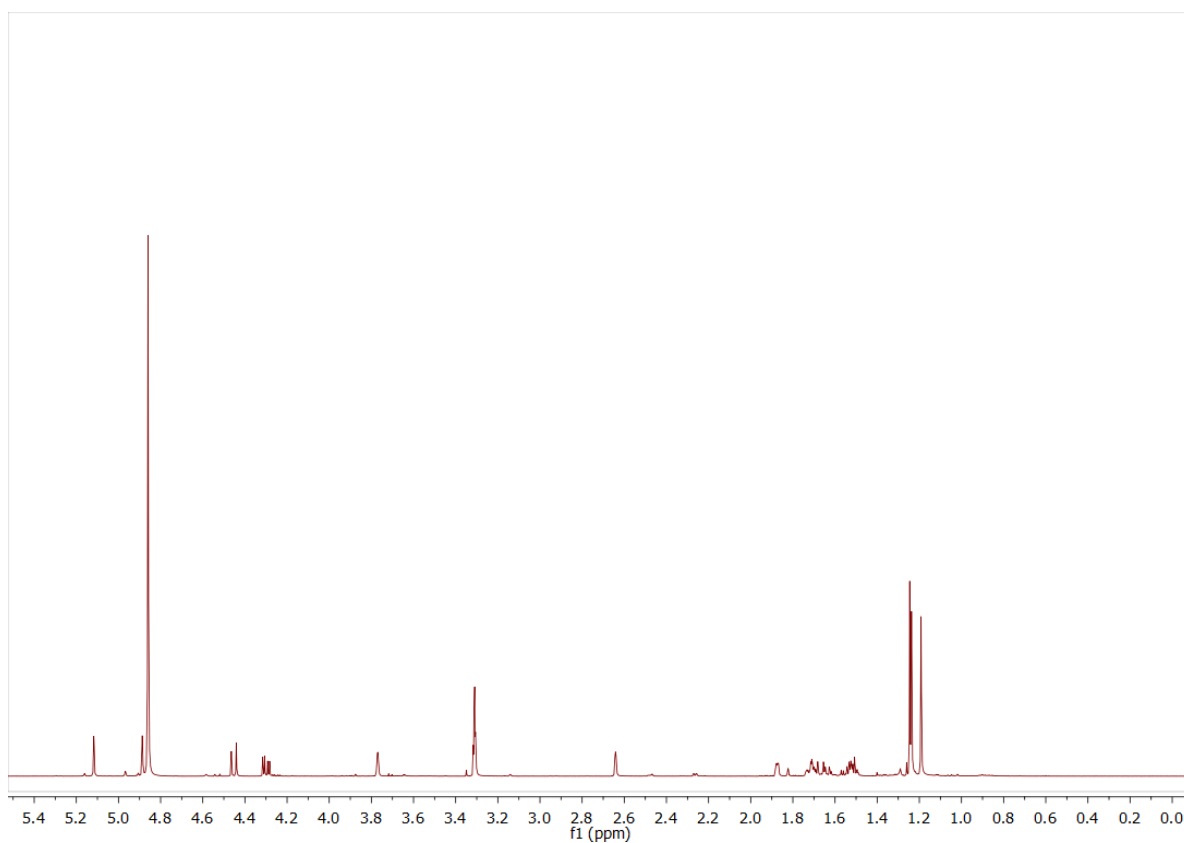

**Figure S1:** <sup>1</sup>H NMR spectrum (500 MHz) of **1** in CD<sub>3</sub>OD

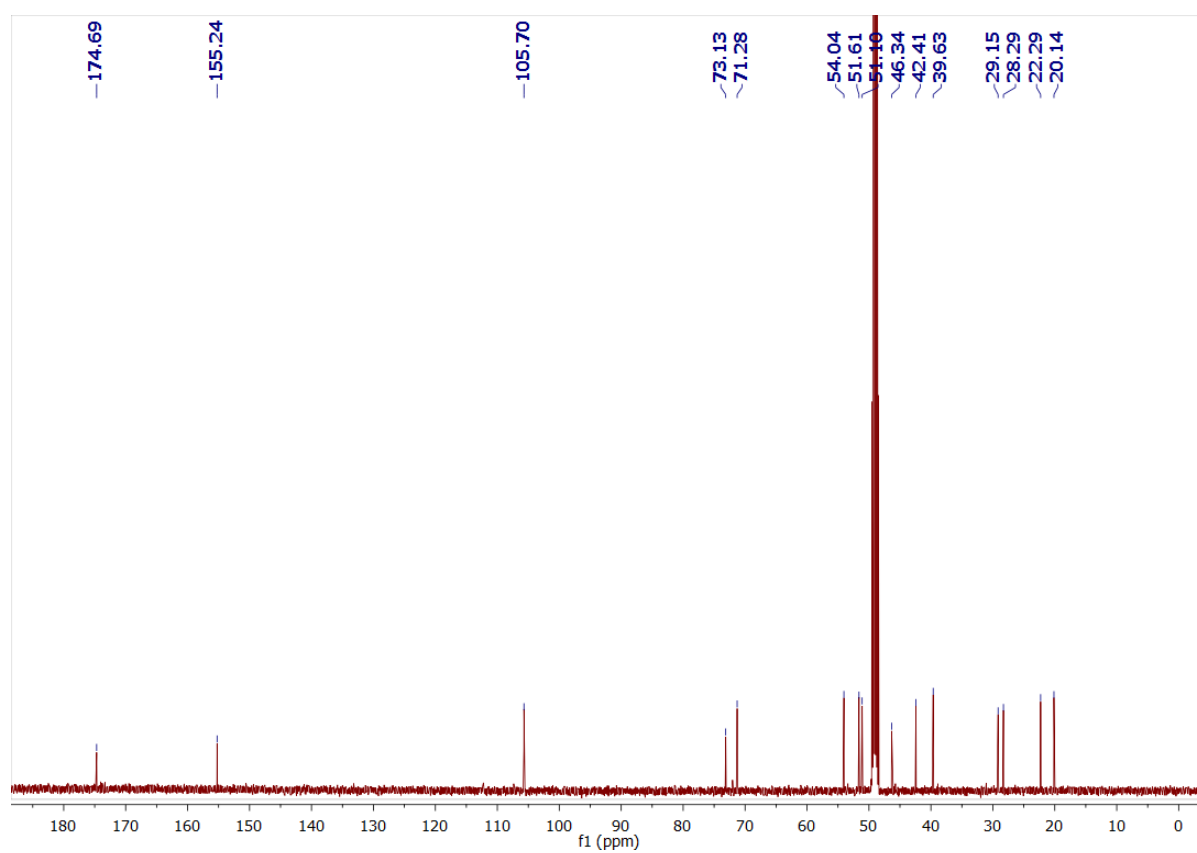

**Figure S2:** <sup>13</sup>C NMR spectrum (125 MHz) of **1** in CD<sub>3</sub>OD

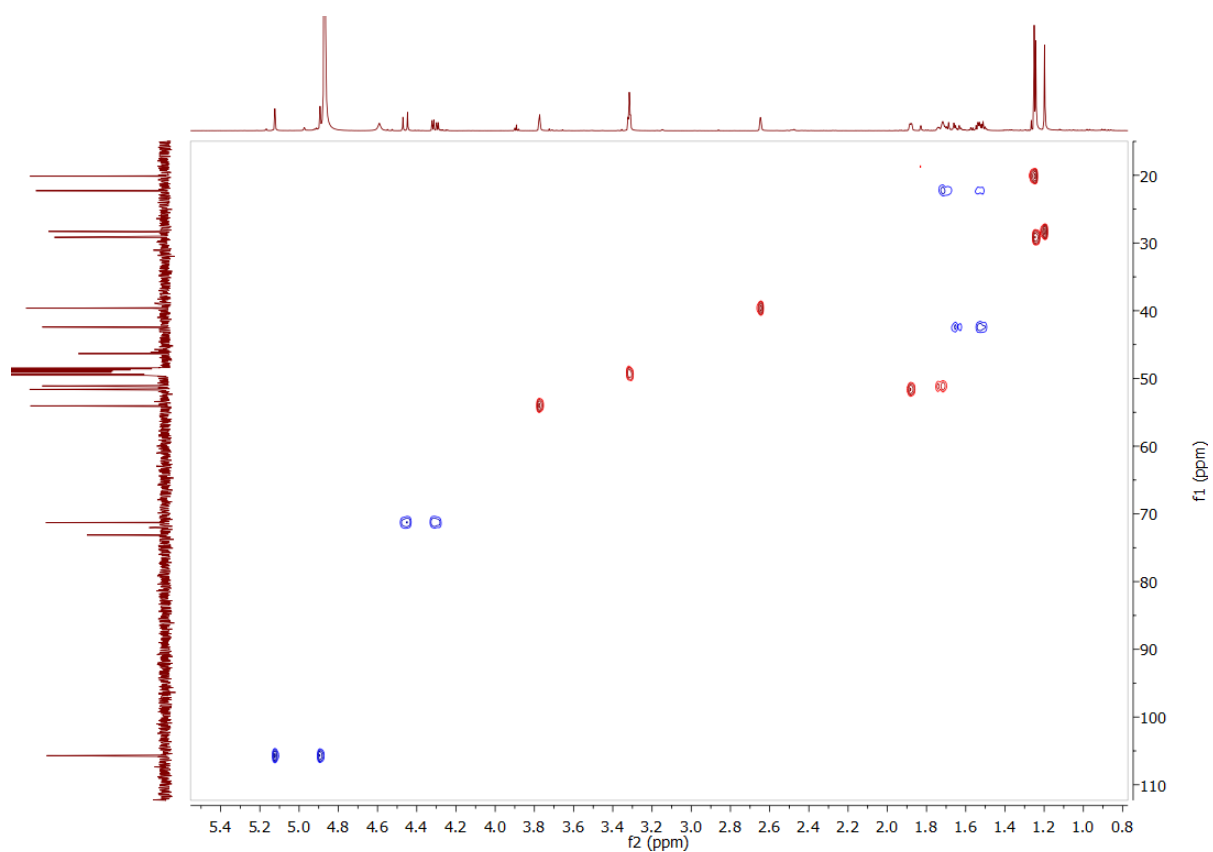

**Figure S3:** HSQC spectrum (500 MHz) of **1** in CD<sub>3</sub>OD

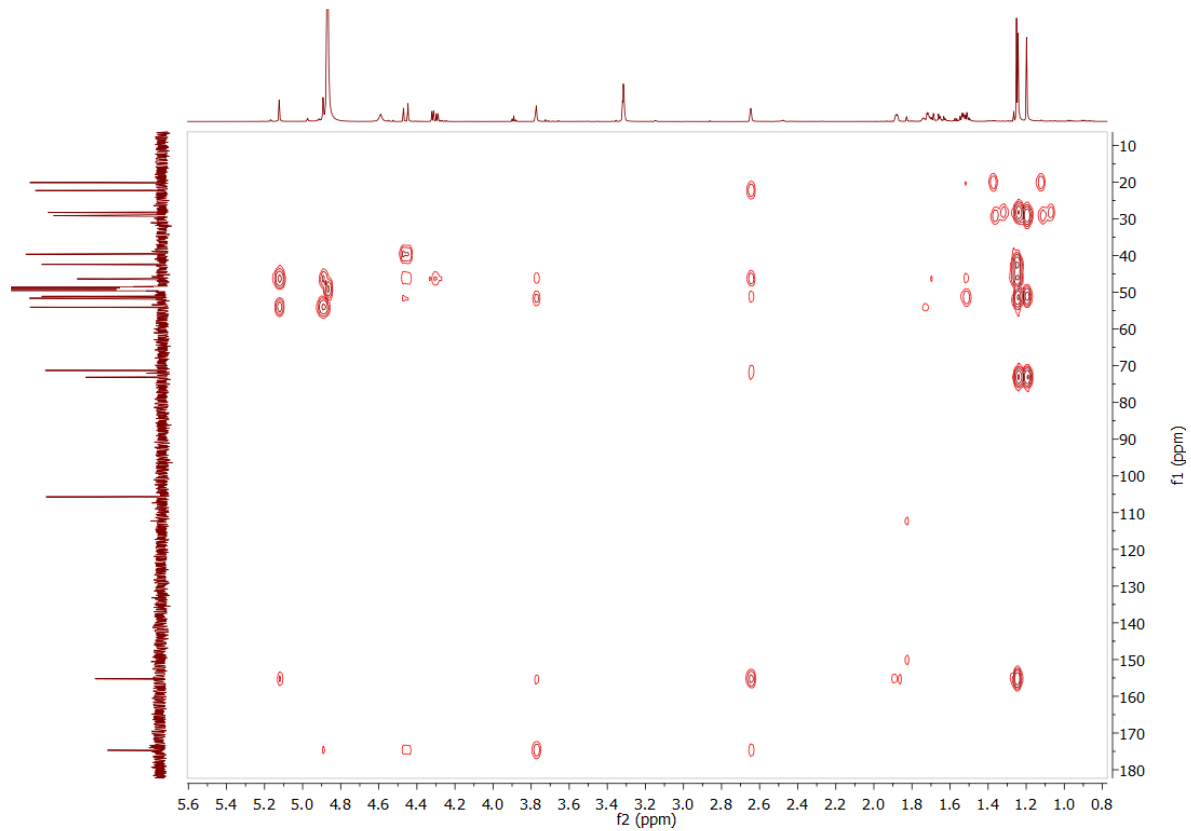

**Figure S4:** HMBC spectrum (500 MHz) of **1** in CD<sub>3</sub>OD

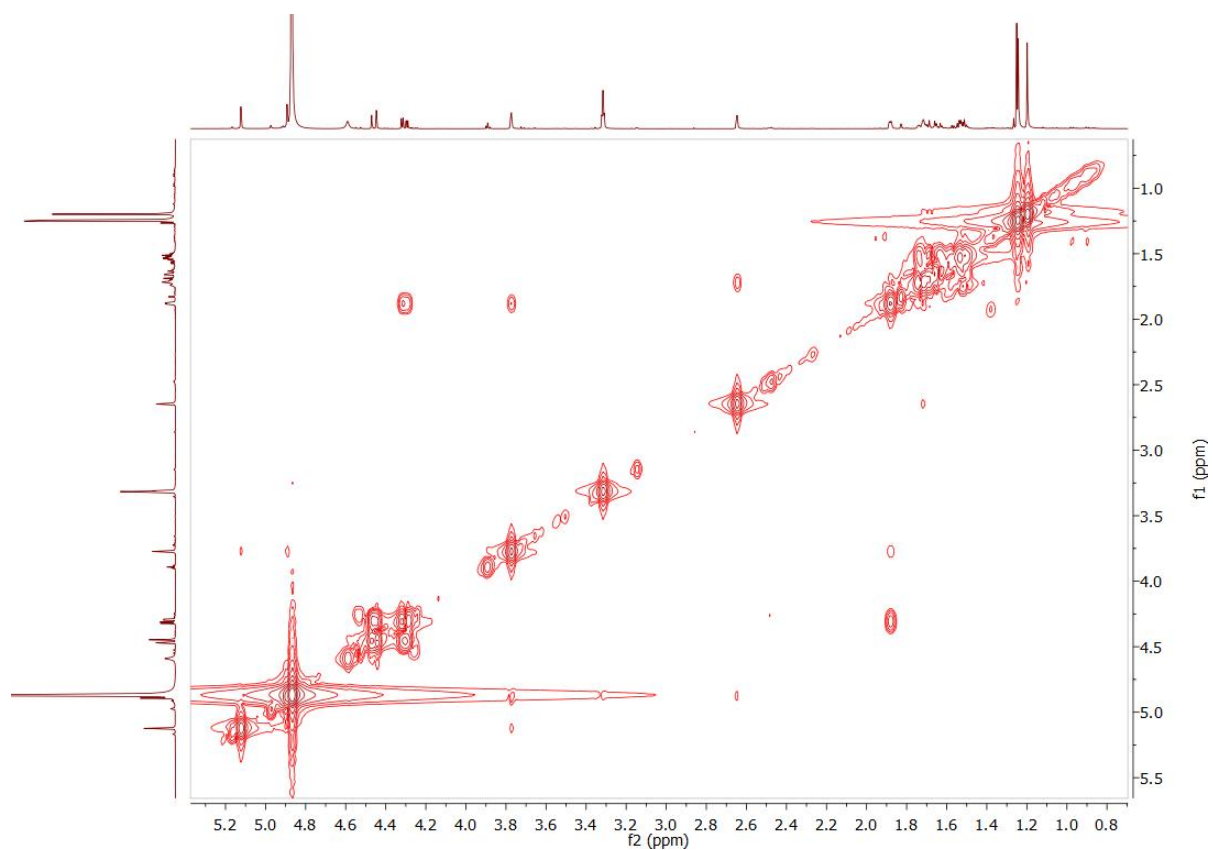

**Figure S5:**  $^1\text{H}$ - $^1\text{H}$  COSY spectrum (500 MHz) of **1** in  $\text{CD}_3\text{OD}$

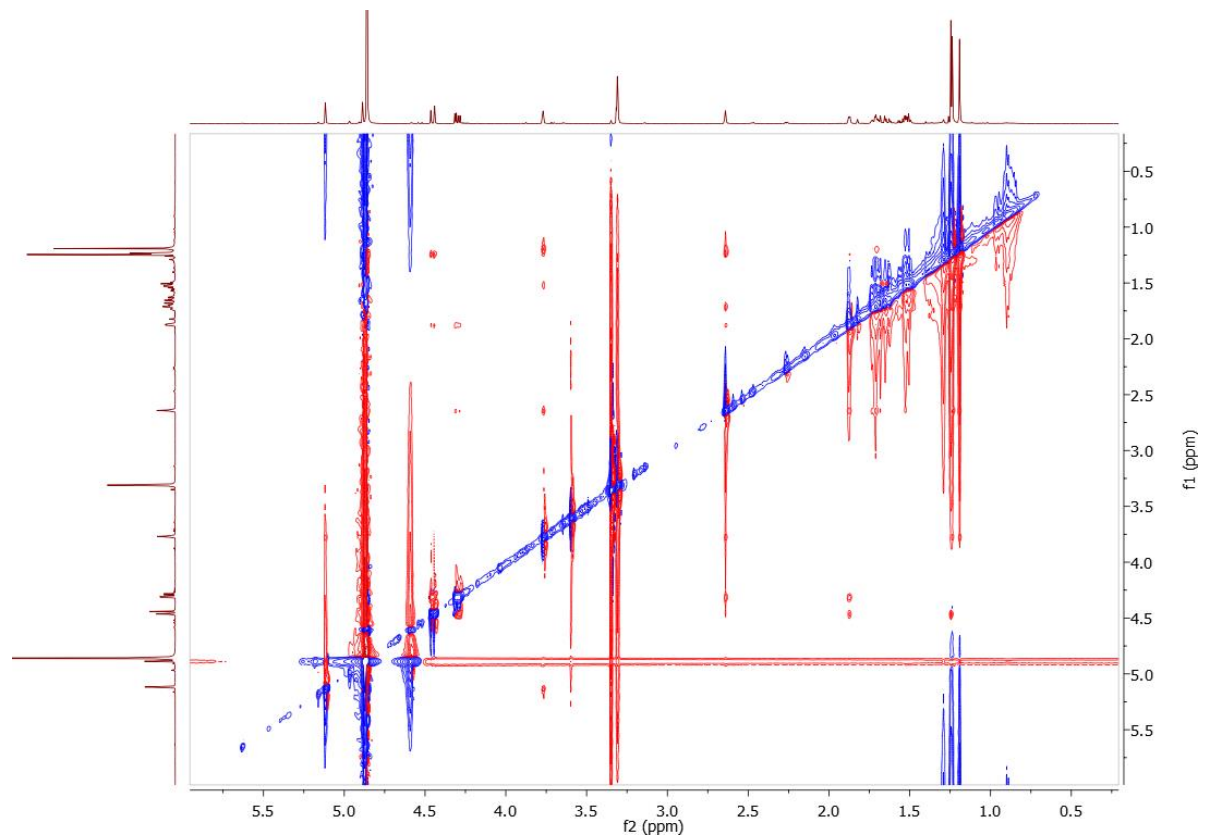

**Figure S6:** NOESY spectrum (500 MHz) of **1** in  $\text{CD}_3\text{OD}$

## Elemental Composition Report

### Single Mass Analysis

Tolerance = 10.0 PPM / DBE: min = -1.5, max = 50.0

Element prediction: Off

Number of isotope peaks used for i-FIT = 3

Monoisotopic Mass, Even Electron Ions

31 formula(e) evaluated with 2 results within limits (up to 50 best isotopic matches for each mass)

Elements Used:

C: 0-20 H: 0-30 O: 0-5 Na: 0-1

ESI+BF12-1729-Jan-2019ESI+BF12-17

ESI+BF12-17

BF12-17+ESI 82 (1.799)

1: TOF MS ES+  
1.30e+004

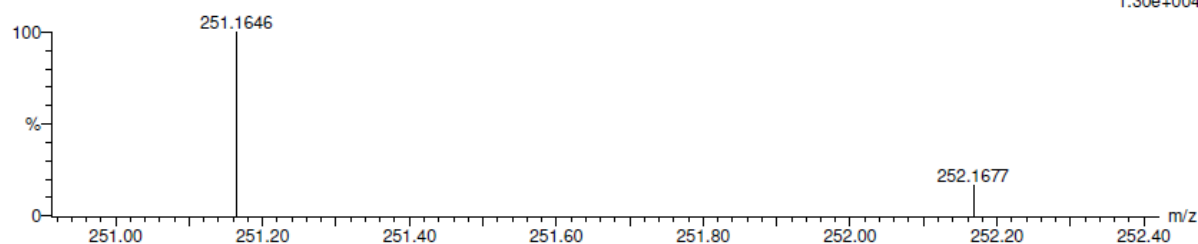

Minimum: -1.5  
Maximum: 5.0 10.0 50.0

| Mass     | Calc. Mass | mDa  | PPM  | DBE | i-FIT | i-FIT (Norm) | Formula       |
|----------|------------|------|------|-----|-------|--------------|---------------|
| 251.1646 | 251.1647   | -0.1 | -0.4 | 4.5 | 24.9  | 0.1          | C15 H23 O3    |
|          | 251.1623   | 2.3  | 9.2  | 1.5 | 26.8  | 2.0          | C13 H24 O3 Na |

## Elemental Composition Report

### Single Mass Analysis

Tolerance = 10.0 PPM / DBE: min = -1.5, max = 50.0

Element prediction: Off

Number of isotope peaks used for i-FIT = 3

Monoisotopic Mass, Even Electron Ions

32 formula(e) evaluated with 2 results within limits (up to 50 best isotopic matches for each mass)

Elements Used:

C: 0-20 H: 0-30 O: 0-5 Na: 0-1

ESI+BF12-1729-Jan-2019ESI+BF12-17

ESI+BF12-17

BF12-17+ESI 82 (1.799)

1: TOF MS ES+  
7.42e+003

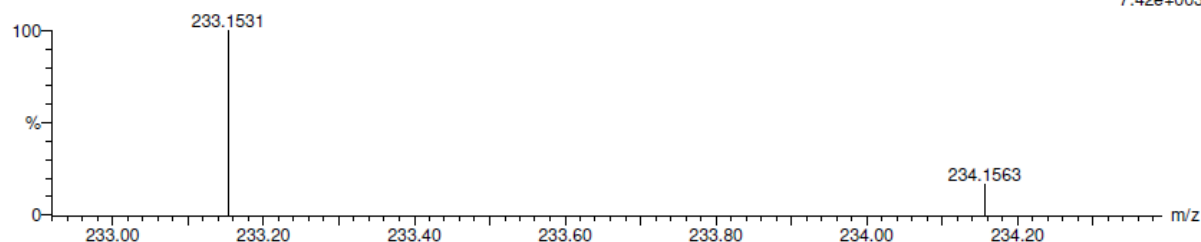

Minimum: -1.5  
Maximum: 5.0 10.0 50.0

| Mass     | Calc. Mass | mDa  | PPM  | DBE | i-FIT | i-FIT (Norm) | Formula       |
|----------|------------|------|------|-----|-------|--------------|---------------|
| 233.1531 | 233.1517   | 1.4  | 6.0  | 2.5 | 23.4  | 0.6          | C13 H22 O2 Na |
|          | 233.1542   | -1.1 | -4.7 | 5.5 | 23.5  | 0.8          | C15 H21 O2    |

Figure S7: HRESIMS spectrum of 1

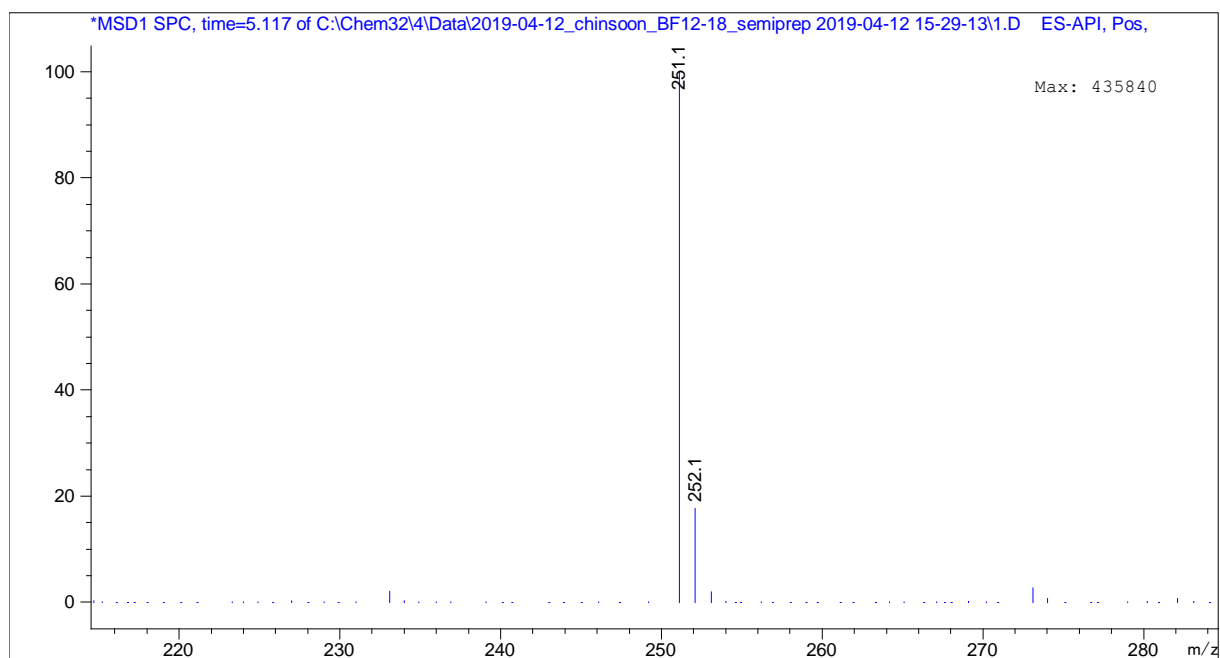

**Figure S8:** ESIMS spectrum of **1**

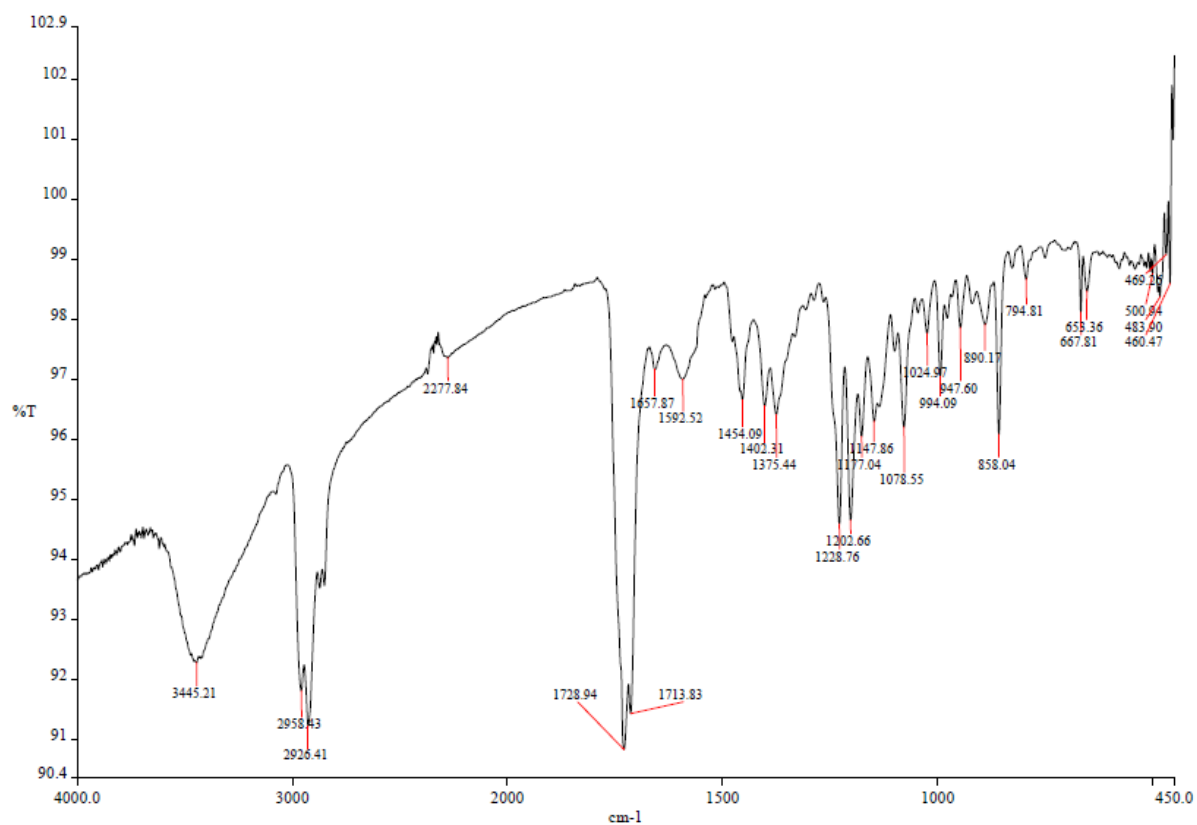

**Figure S9:** IR spectrum of **1**



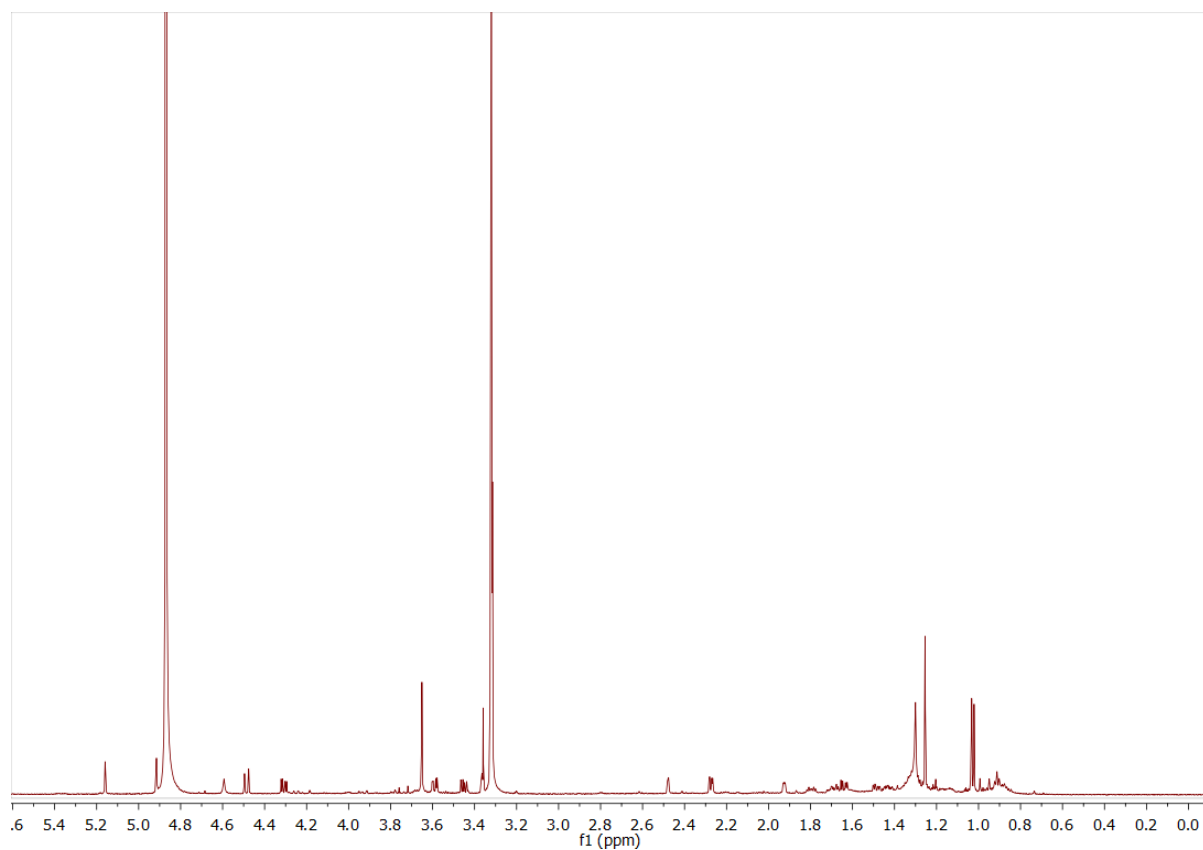

**Figure S10:**  $^1\text{H}$  NMR spectrum (600 MHz) of **2** in  $\text{CD}_3\text{OD}$

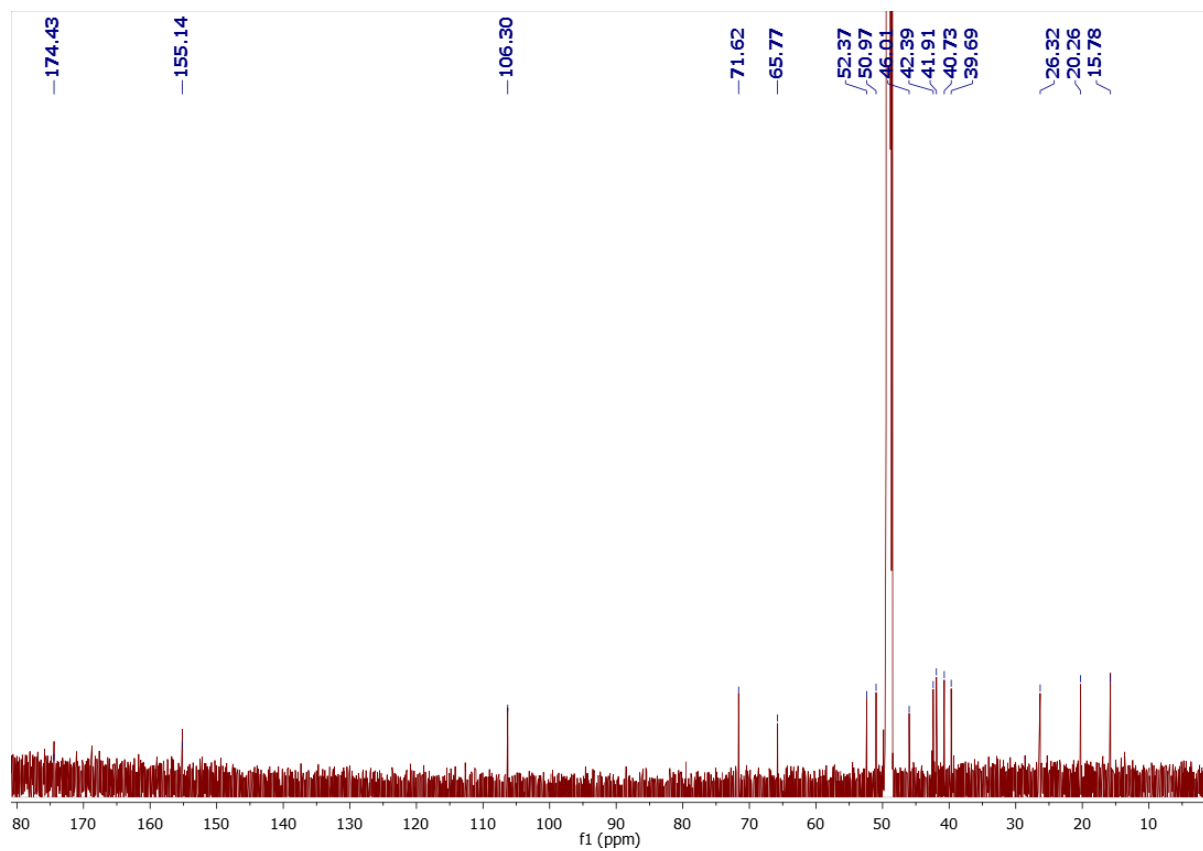

**Figure S11:**  $^{13}\text{C}$  NMR spectrum (150 MHz) of **2** in  $\text{CD}_3\text{OD}$

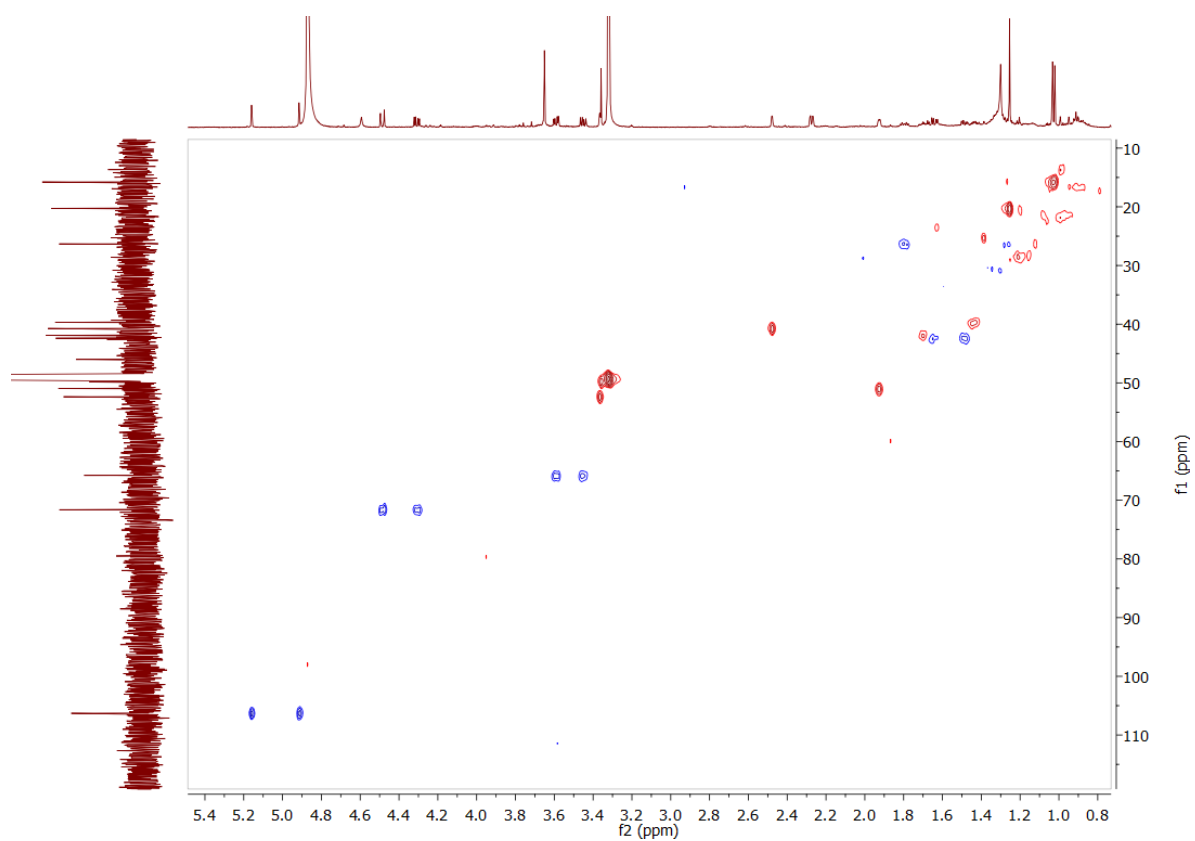

**Figure S12:** HSQC spectrum (600 MHz) of **2** in CD<sub>3</sub>OD

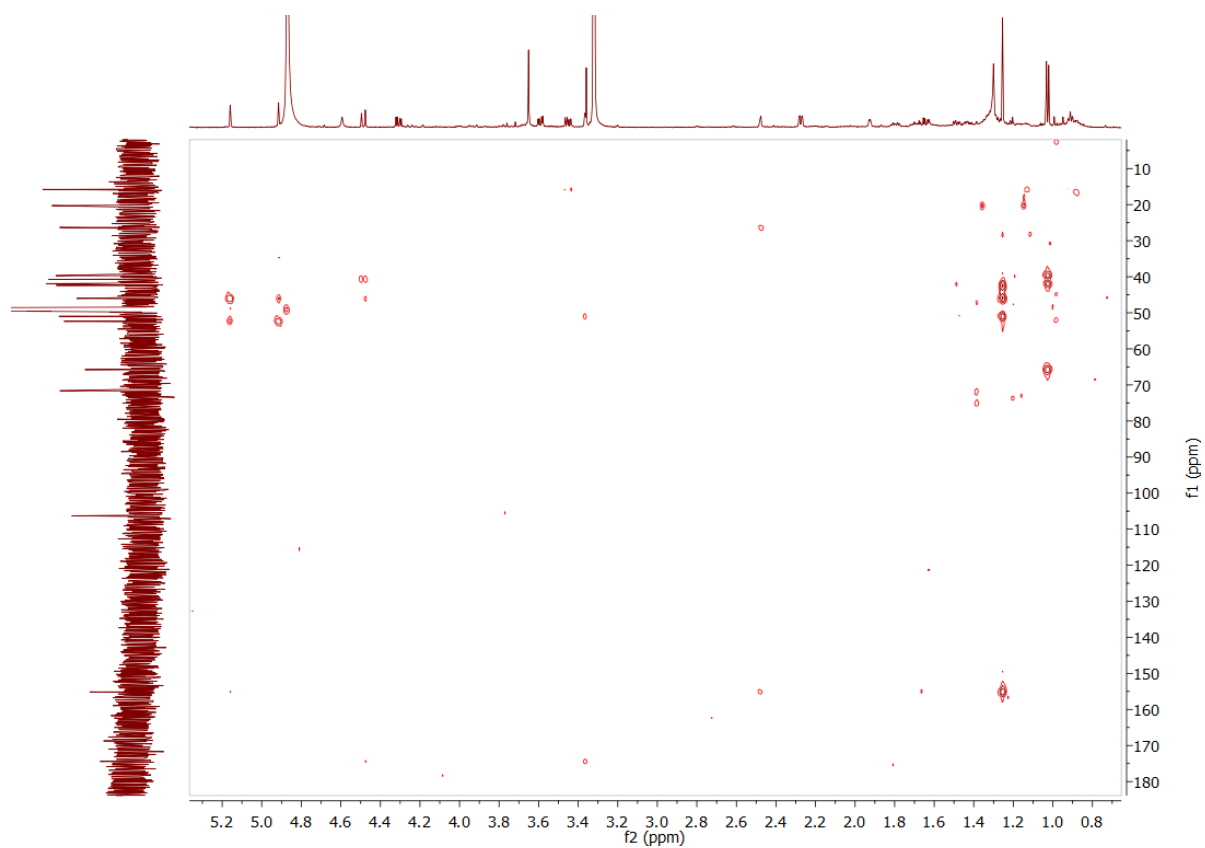

**Figure S13:** HMBC spectrum (600 MHz) of **2** in CD<sub>3</sub>OD

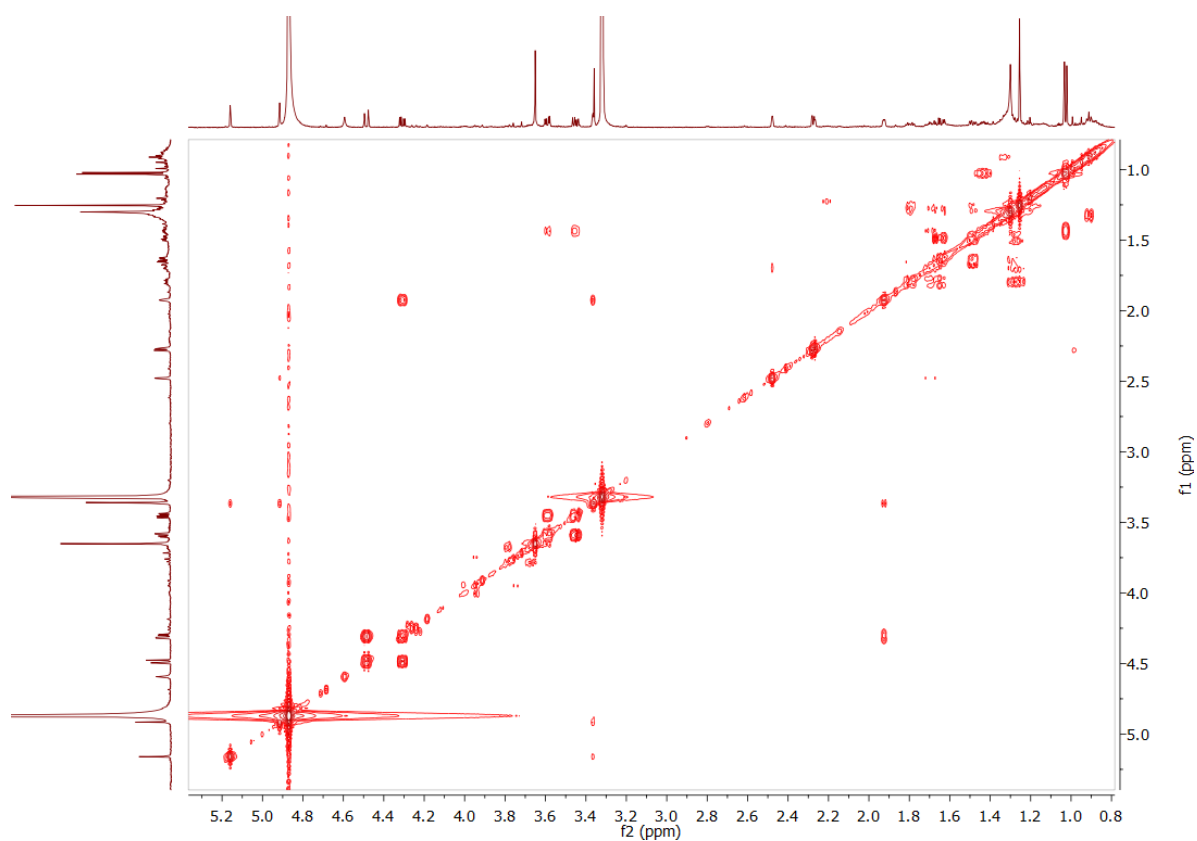

**Figure S14:**  $^1\text{H}$ - $^1\text{H}$  COSY spectrum (600 MHz) of **2** in  $\text{CD}_3\text{OD}$

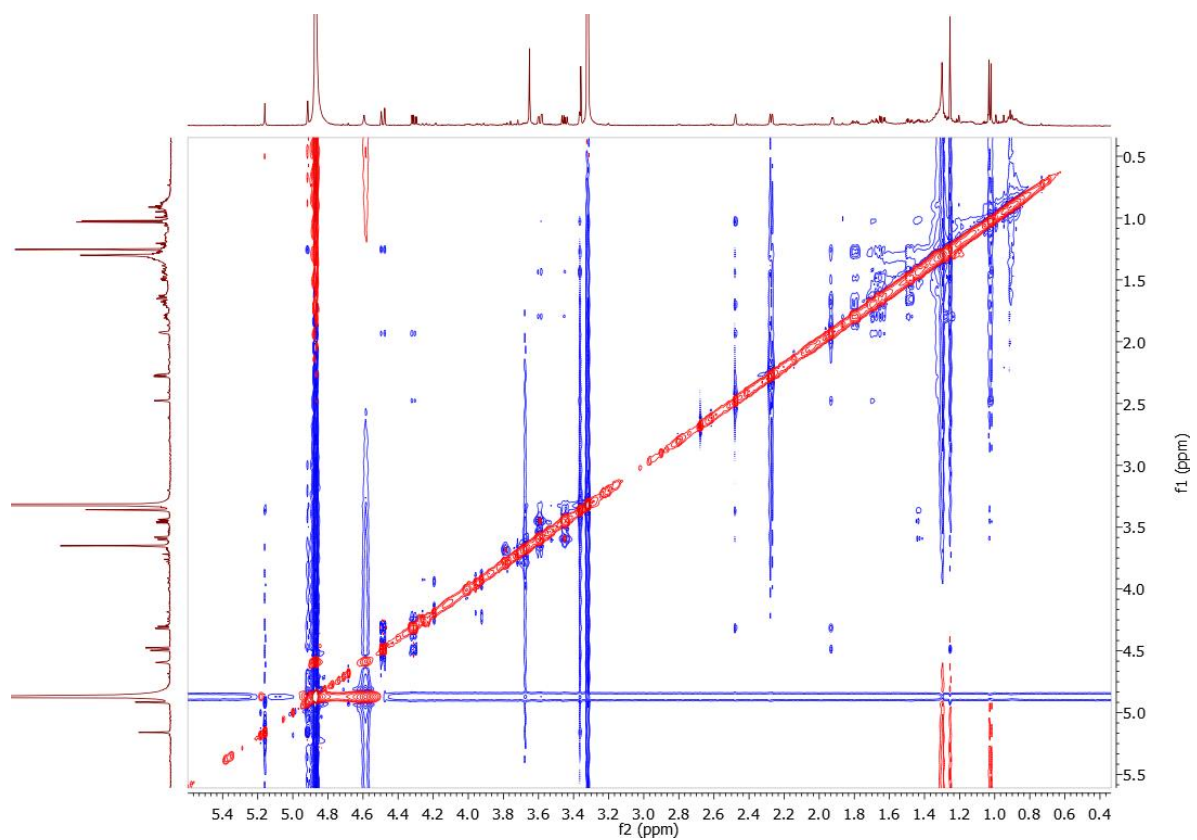

**Figure S15:** NOESY spectrum (600 MHz) of **2** in  $\text{CD}_3\text{OD}$

## Elemental Composition Report

### Single Mass Analysis

Tolerance = 10.0 PPM / DBE: min = -1.5, max = 50.0

Element prediction: Off

Number of isotope peaks used for i-FIT = 3

Monoisotopic Mass, Even Electron Ions

35 formula(e) evaluated with 1 results within limits (up to 50 best isotopic matches for each mass)

Elements Used:

C: 0-50 H: 0-50 O: 0-10

BF12-1415-Apr-2019BF12-14

BF12-14

BF12-14 9 (0.195)

1: TOF MS ES+  
2.16e+003

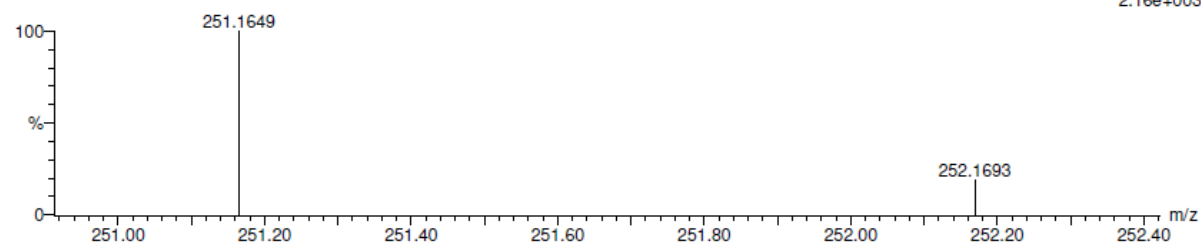

Minimum: -1.5  
Maximum: 50.0

| Mass     | Calc. Mass | mDa | PPM | DBE | i-FIT | i-FIT (Norm) | Formula    |
|----------|------------|-----|-----|-----|-------|--------------|------------|
| 251.1649 | 251.1647   | 0.2 | 0.8 | 4.5 | 19.6  | 0.0          | C15 H23 O3 |

## Elemental Composition Report

### Single Mass Analysis

Tolerance = 10.0 PPM / DBE: min = -1.5, max = 50.0

Element prediction: Off

Number of isotope peaks used for i-FIT = 3

Monoisotopic Mass, Even Electron Ions

31 formula(e) evaluated with 1 results within limits (up to 50 best isotopic matches for each mass)

Elements Used:

C: 0-50 H: 0-50 O: 0-10

BF12-1415-Apr-2019BF12-14

BF12-14

BF12-14 9 (0.195)

1: TOF MS ES+  
6.97e+002

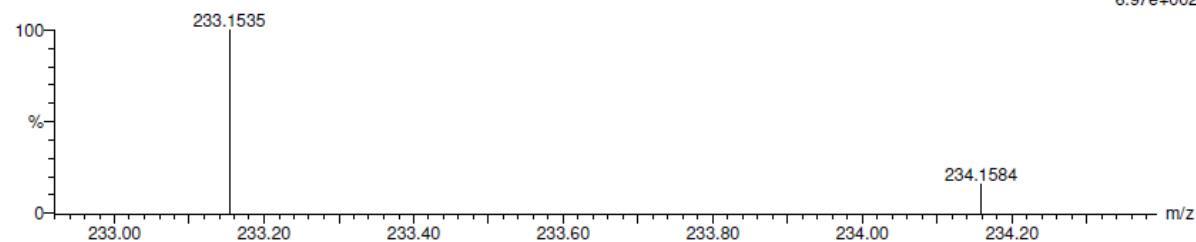

Minimum: -1.5  
Maximum: 50.0

| Mass     | Calc. Mass | mDa  | PPM  | DBE | i-FIT | i-FIT (Norm) | Formula    |
|----------|------------|------|------|-----|-------|--------------|------------|
| 233.1535 | 233.1542   | -0.7 | -3.0 | 5.5 | 14.8  | 0.0          | C15 H21 O2 |

**Figure S16:** HRESIMS spectrum of **2**

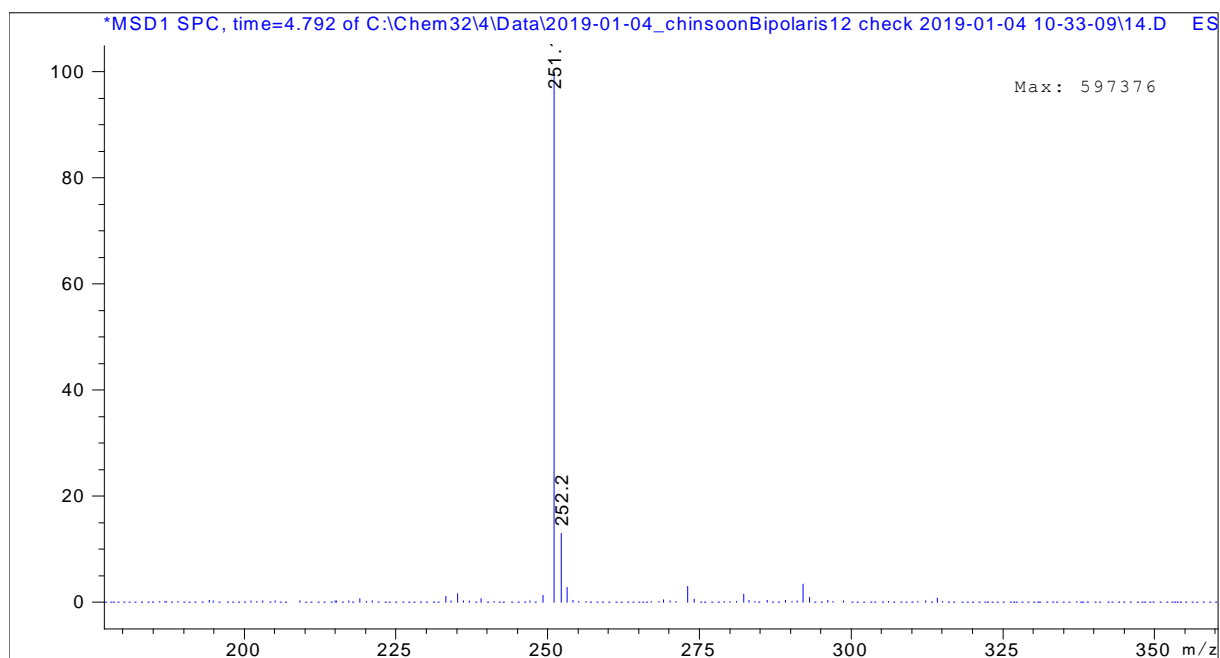

**Figure S17:** ESIMS spectrum of **2**

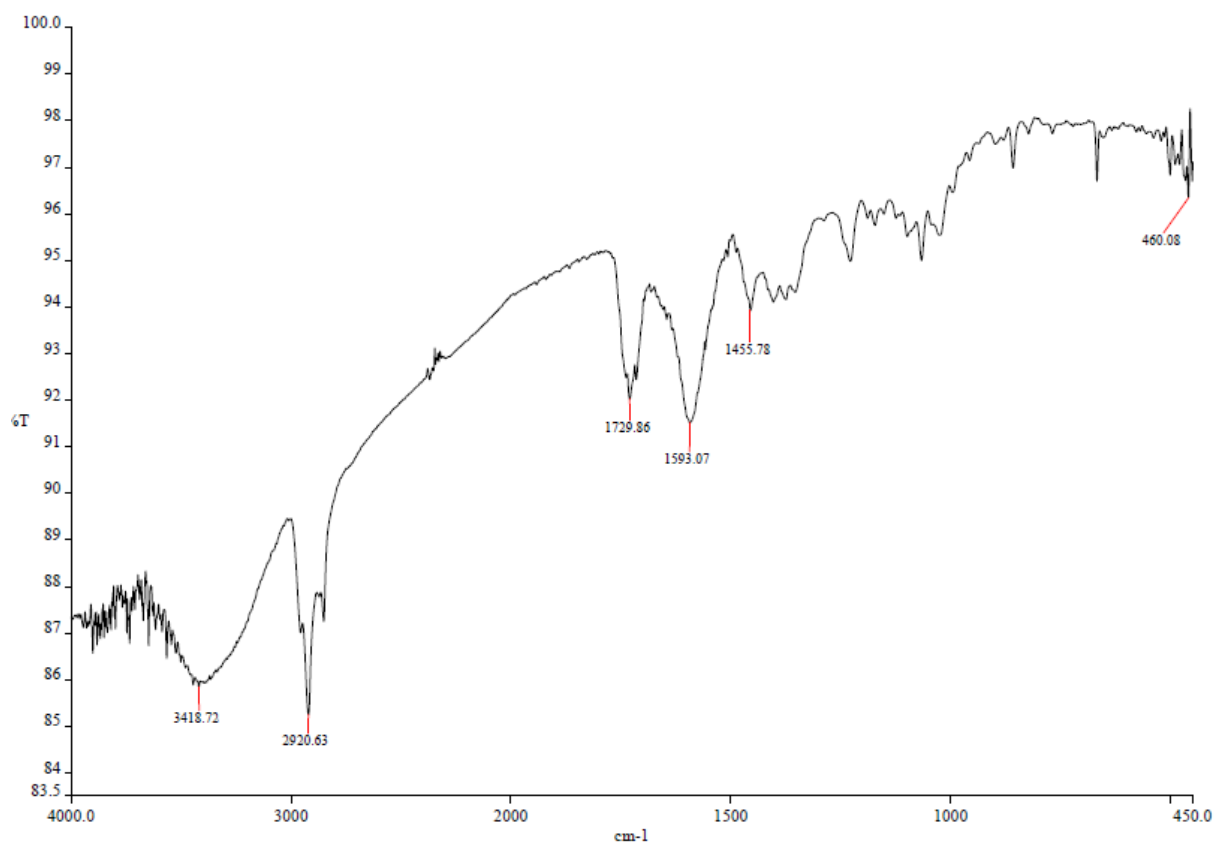

**Figure S18:** IR spectrum of **2**

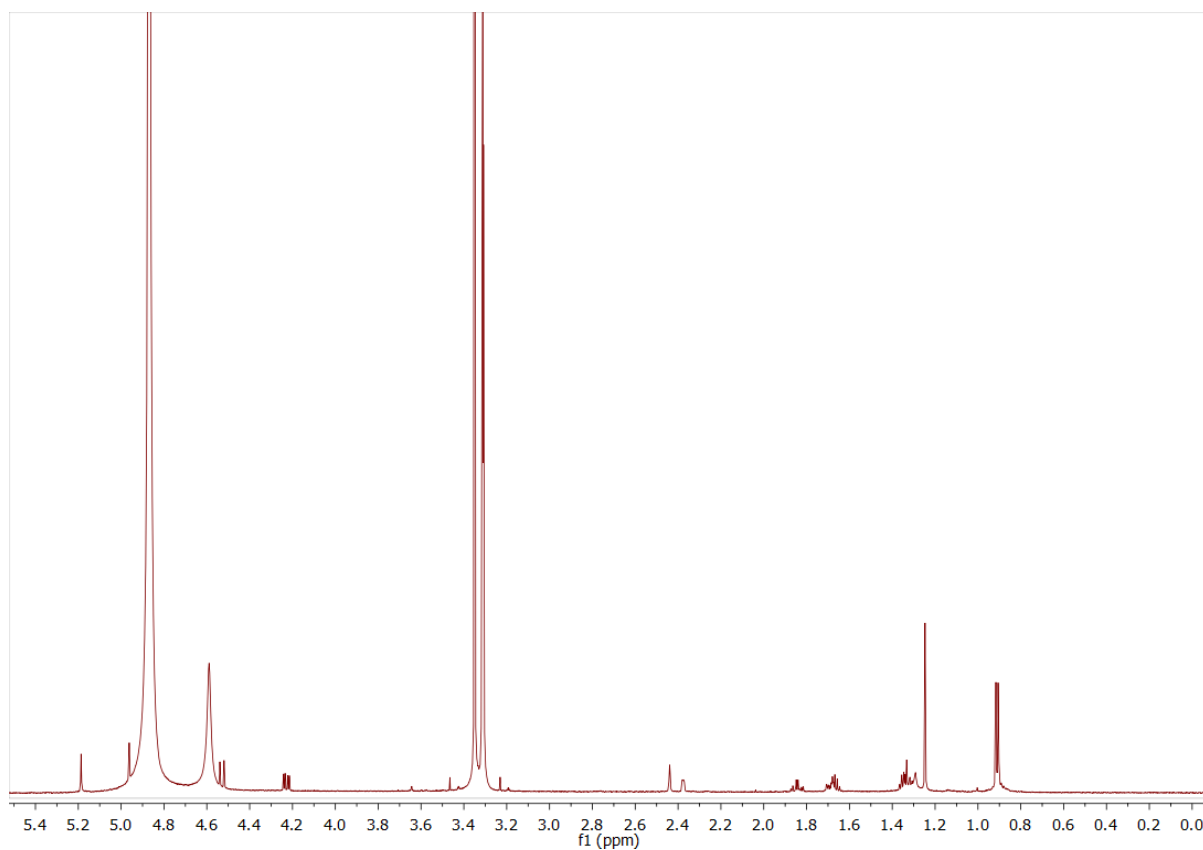

**Figure S19:** <sup>1</sup>H NMR spectrum (600 MHz) of **3** in CD<sub>3</sub>OD

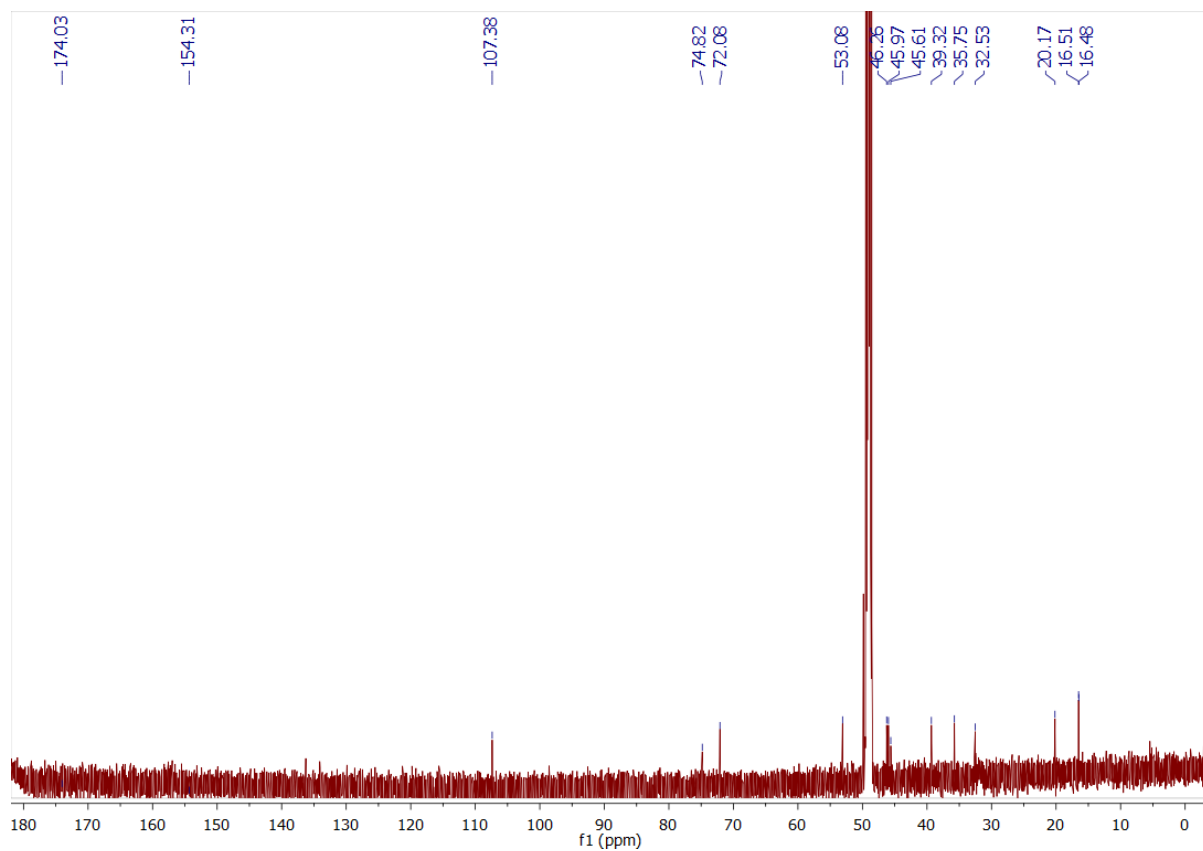

**Figure S20:** <sup>13</sup>C NMR spectrum (150 MHz) of **3** in CD<sub>3</sub>OD

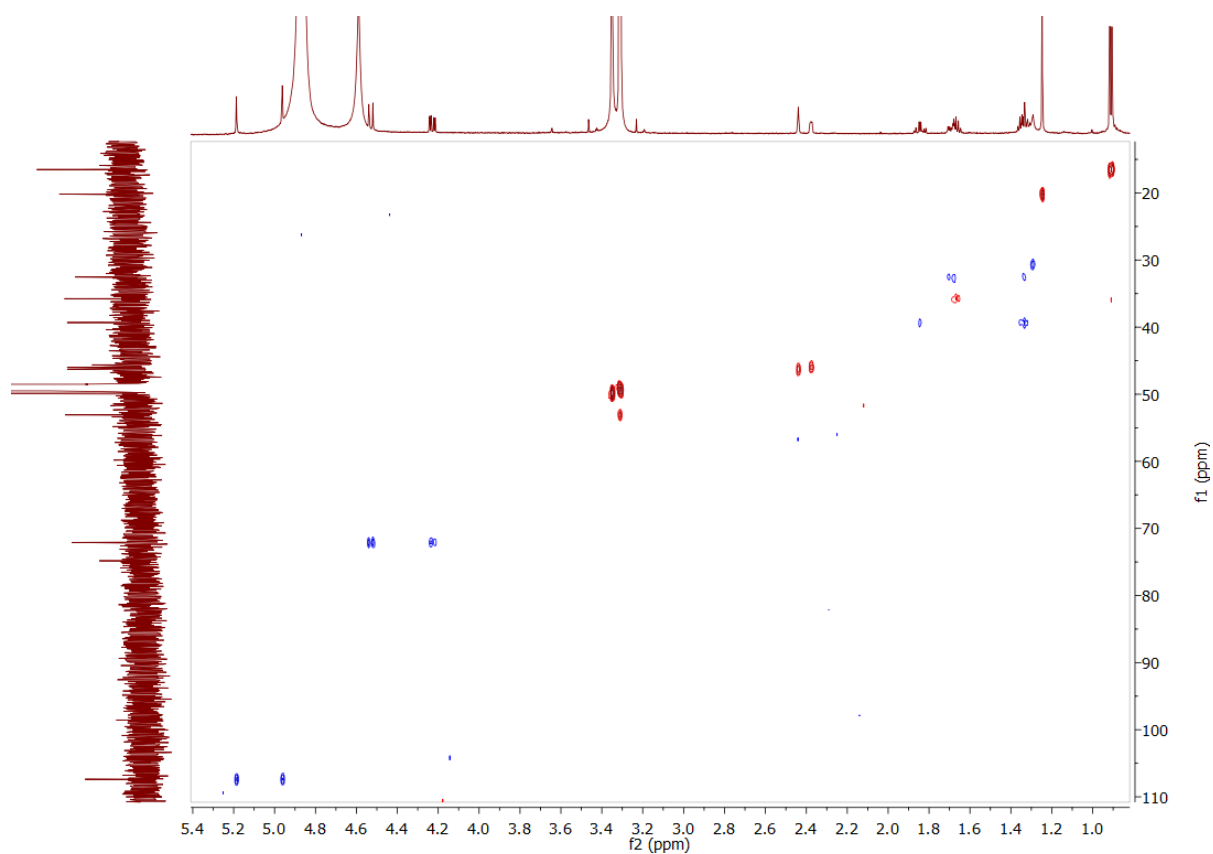

**Figure S21:** HSQC spectrum (600 MHz) of **3** in CD<sub>3</sub>OD

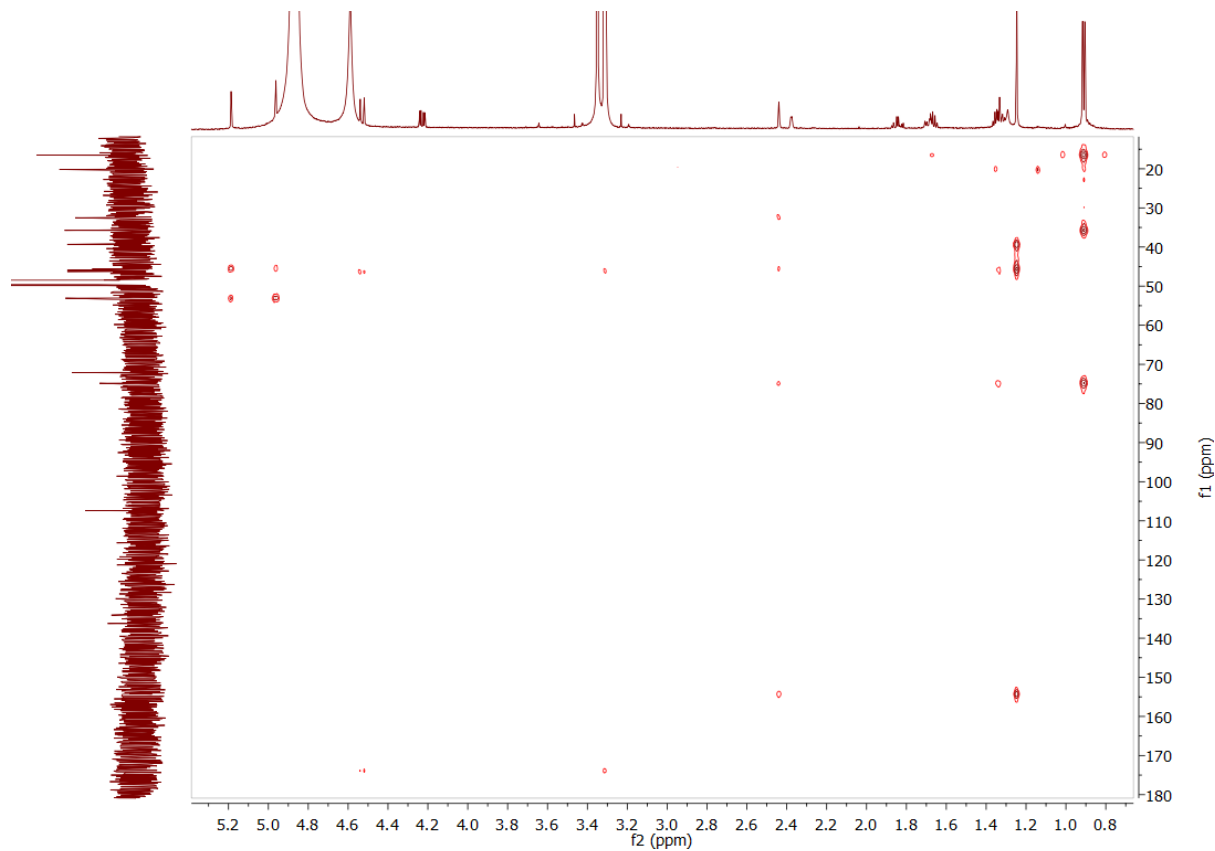

**Figure S22:** HMBC spectrum (600 MHz) of **3** in CD<sub>3</sub>OD

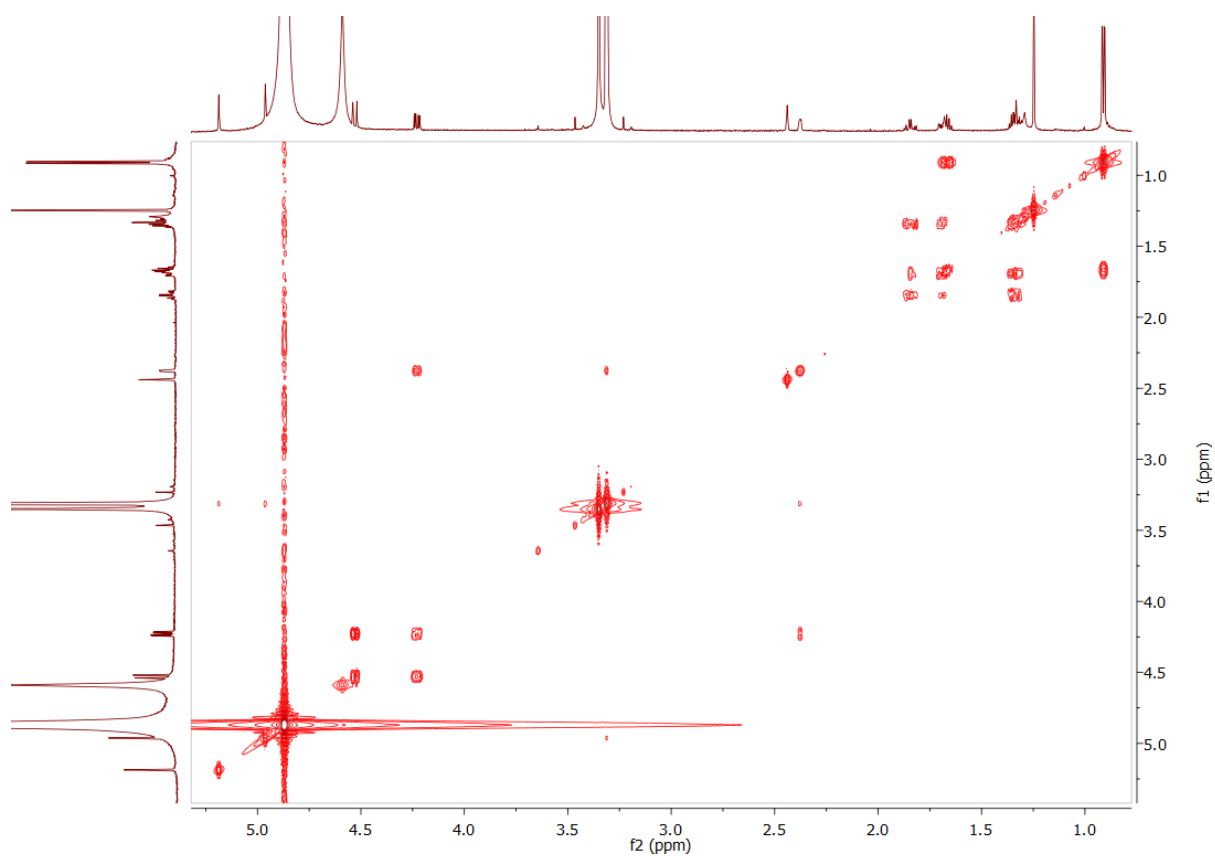

**Figure S23:**  $^1\text{H}$ - $^1\text{H}$  COSY spectrum (600 MHz) of **3** in  $\text{CD}_3\text{OD}$

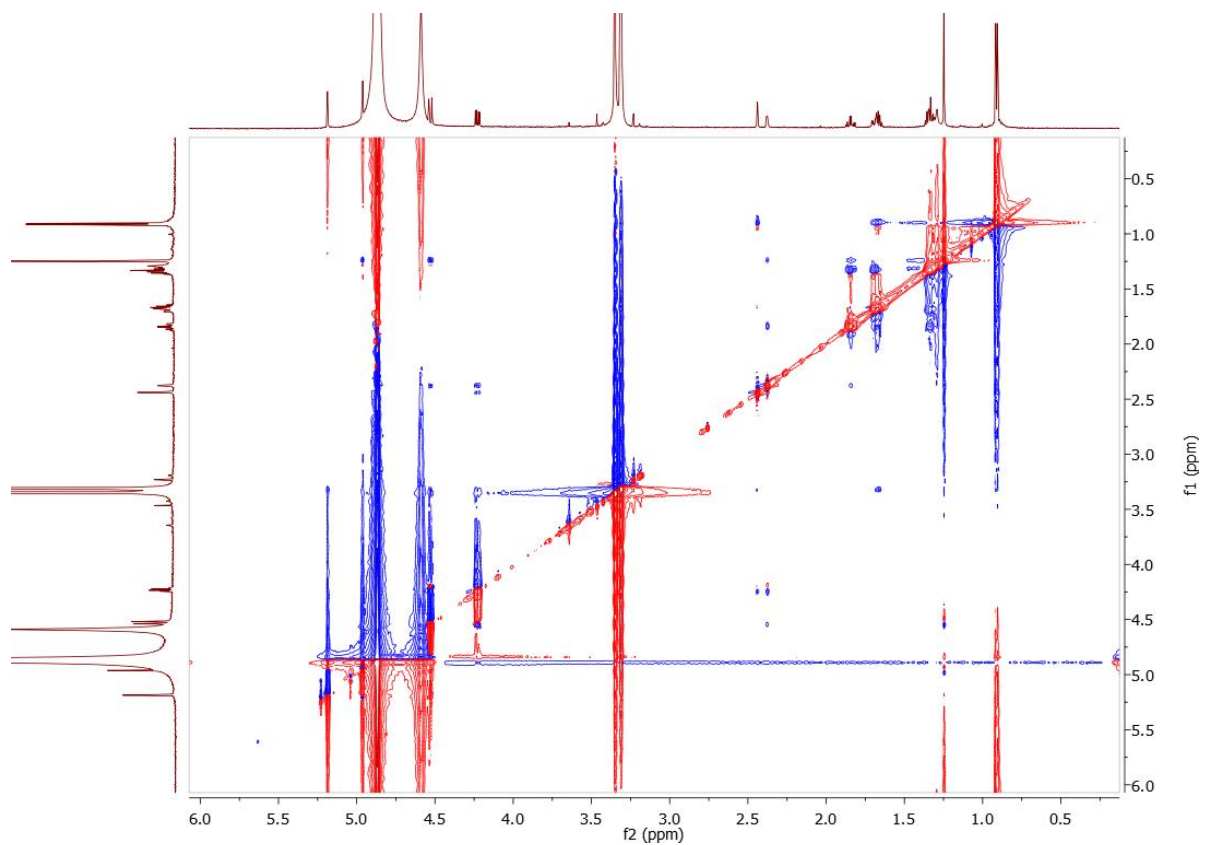

**Figure S24:** NOESY spectrum (600 MHz) of **3** in  $\text{CD}_3\text{OD}$



## Elemental Composition Report

### Single Mass Analysis

Tolerance = 10.0 PPM / DBE: min = -1.5, max = 50.0

Element prediction: Off

Number of isotope peaks used for i-FIT = 3

Monoisotopic Mass, Even Electron Ions

35 formula(e) evaluated with 1 results within limits (up to 50 best isotopic matches for each mass)

Elements Used:

C: 0-50 H: 0-50 O: 0-10

BF12-8-215-Apr-2019BF12-8-2

BF12-8-2

BF12-8-2 9 (0.195)

1: TOF MS ES+  
2.88e+003

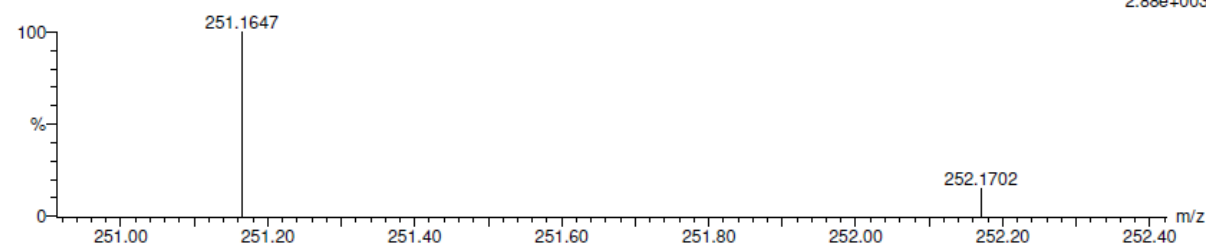

Minimum: -1.5  
Maximum: 5.0 10.0 50.0

| Mass     | Calc. Mass | mDa | PPM | DBE | i-FIT | i-FIT (Norm) | Formula    |
|----------|------------|-----|-----|-----|-------|--------------|------------|
| 251.1647 | 251.1647   | 0.0 | 0.0 | 4.5 | 22.2  | 0.0          | C15 H23 O3 |

## Elemental Composition Report

### Single Mass Analysis

Tolerance = 10.0 PPM / DBE: min = -1.5, max = 50.0

Element prediction: Off

Number of isotope peaks used for i-FIT = 3

Monoisotopic Mass, Even Electron Ions

31 formula(e) evaluated with 1 results within limits (up to 50 best isotopic matches for each mass)

Elements Used:

C: 0-50 H: 0-50 O: 0-10

BF12-8-215-Apr-2019BF12-8-2

BF12-8-2

BF12-8-2 10 (0.212)

1: TOF MS ES+  
2.68e+003

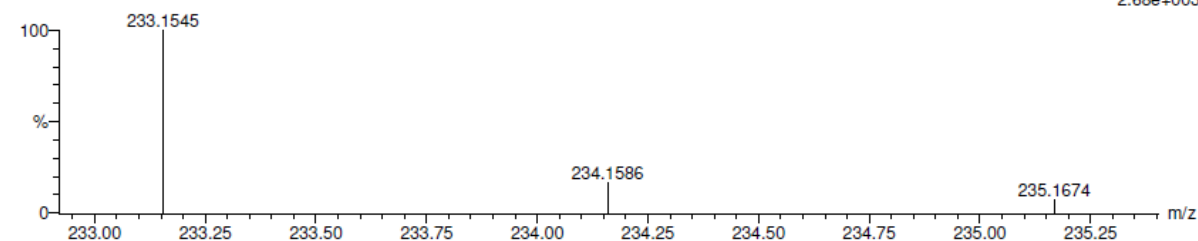

Minimum: -1.5  
Maximum: 5.0 10.0 50.0

| Mass     | Calc. Mass | mDa | PPM | DBE | i-FIT | i-FIT (Norm) | Formula    |
|----------|------------|-----|-----|-----|-------|--------------|------------|
| 233.1545 | 233.1542   | 0.3 | 1.3 | 5.5 | 16.9  | 0.0          | C15 H21 O2 |

Figure S25: HRESIMS spectrum of 3

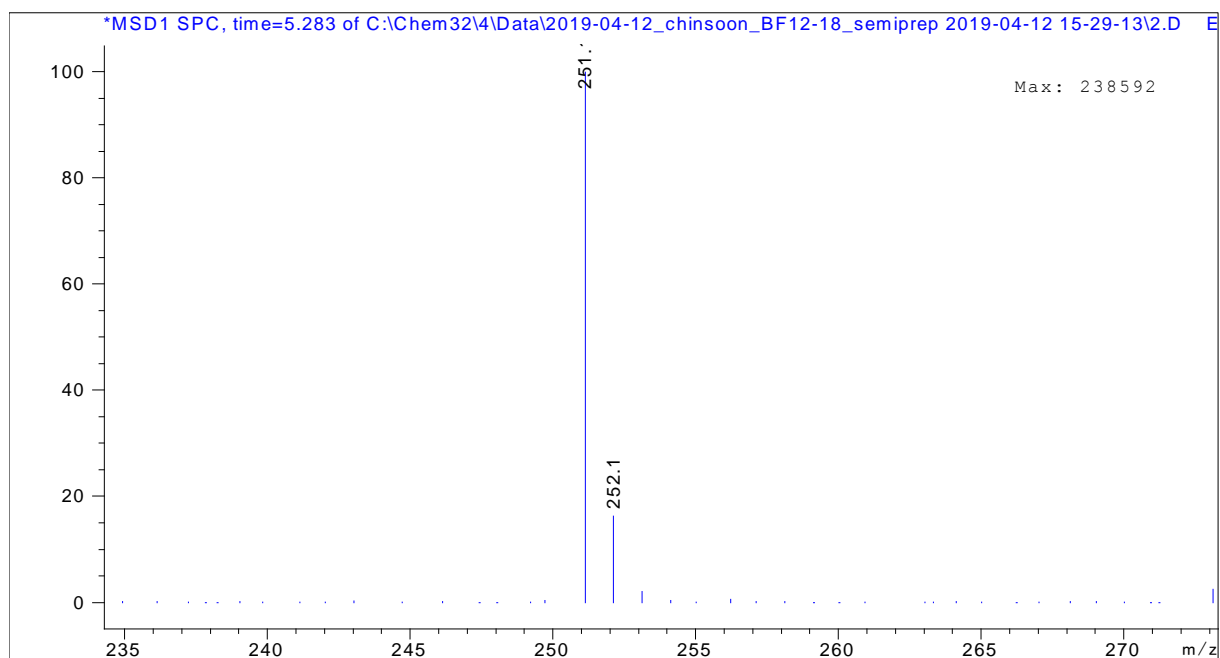

**Figure S26:** ESIMS spectrum of **3**

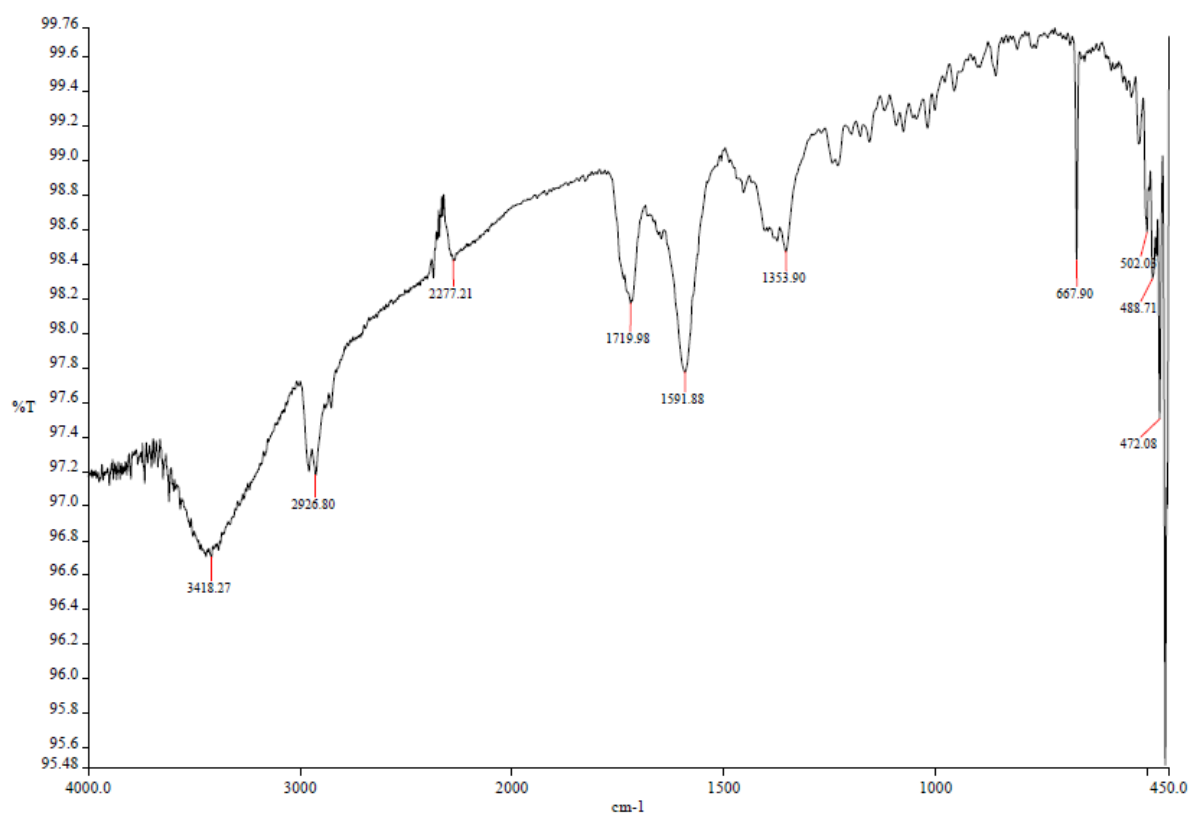

**Figure S27:** IR spectrum of **3**

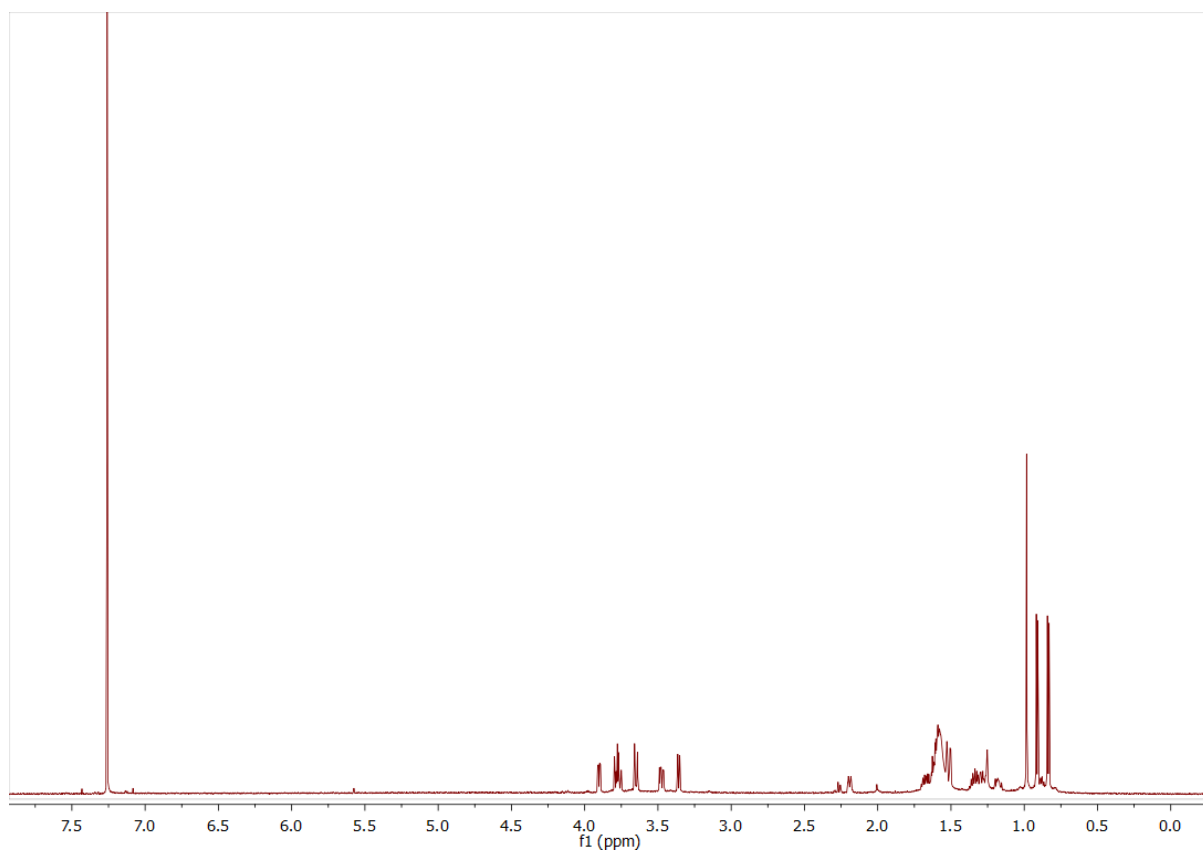

**Figure S28:**  $^1\text{H}$  NMR spectrum (600 MHz) of **4** in  $\text{CDCl}_3$

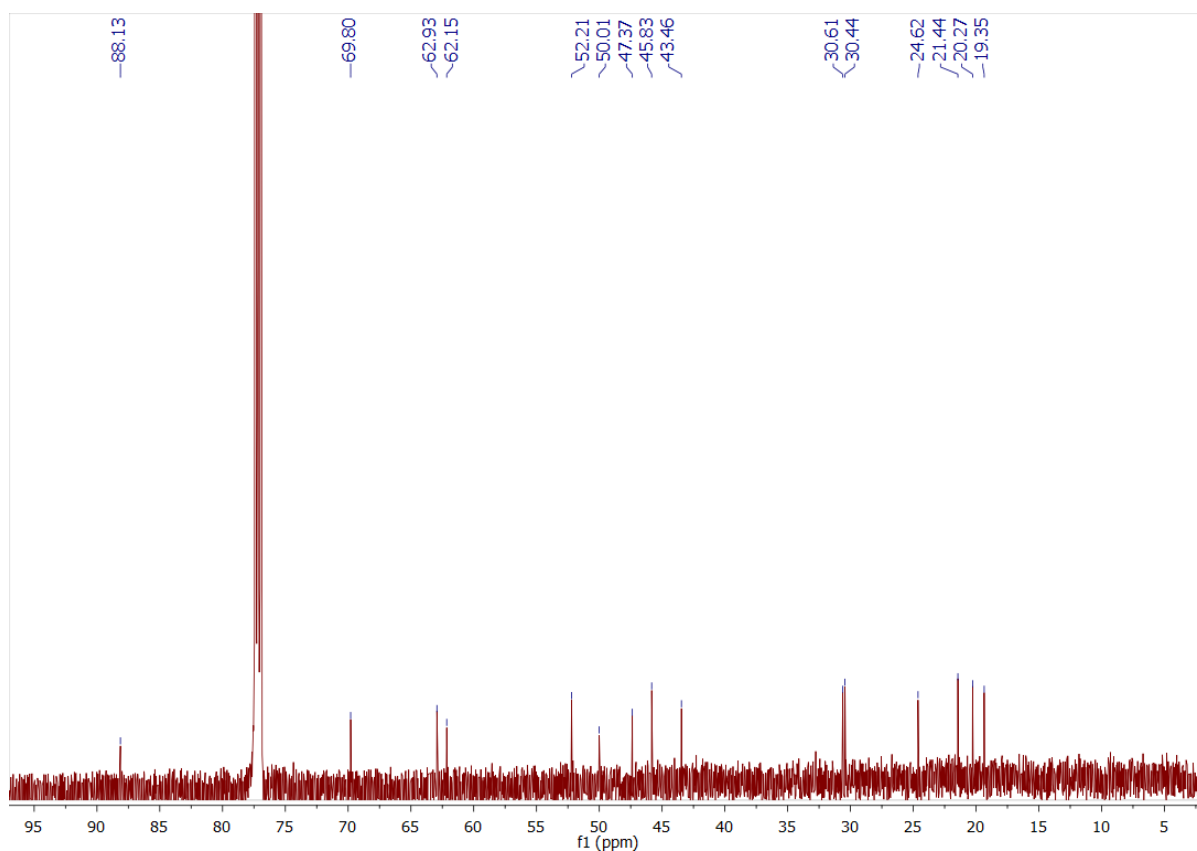

**Figure S29:**  $^{13}\text{C}$  NMR spectrum (150 MHz) of **4** in  $\text{CDCl}_3$

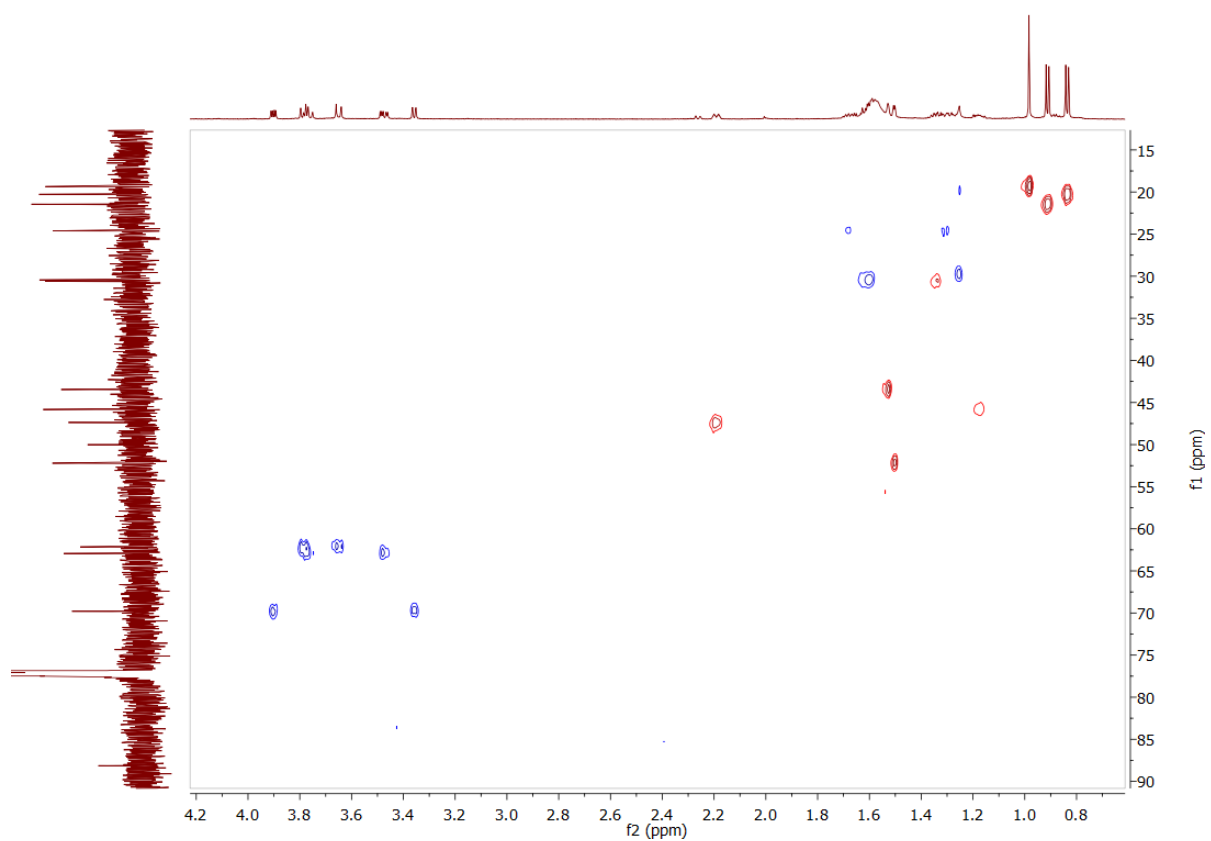

**Figure S30:** HSQC spectrum (600 MHz) of **4** in  $\text{CDCl}_3$

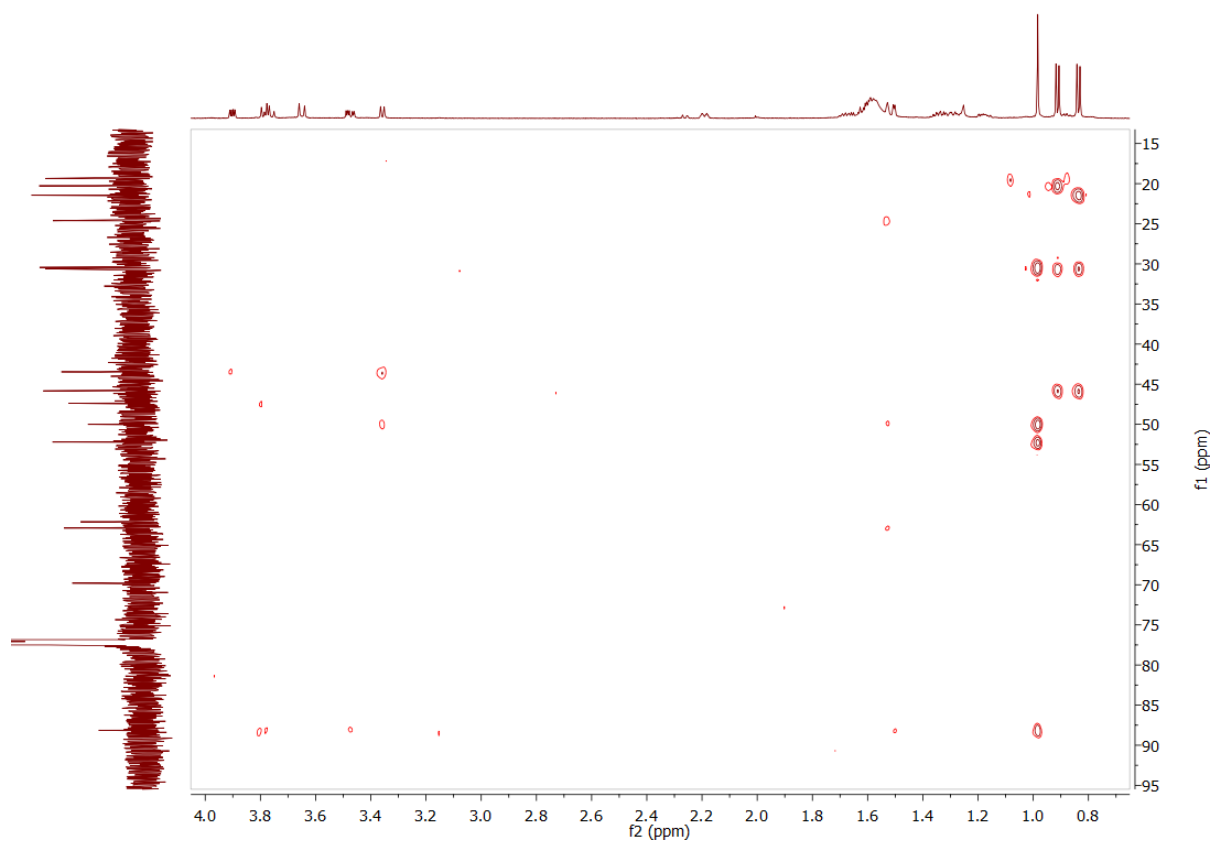

**Figure S31:** HMBC spectrum (600 MHz) of **4** in  $\text{CDCl}_3$

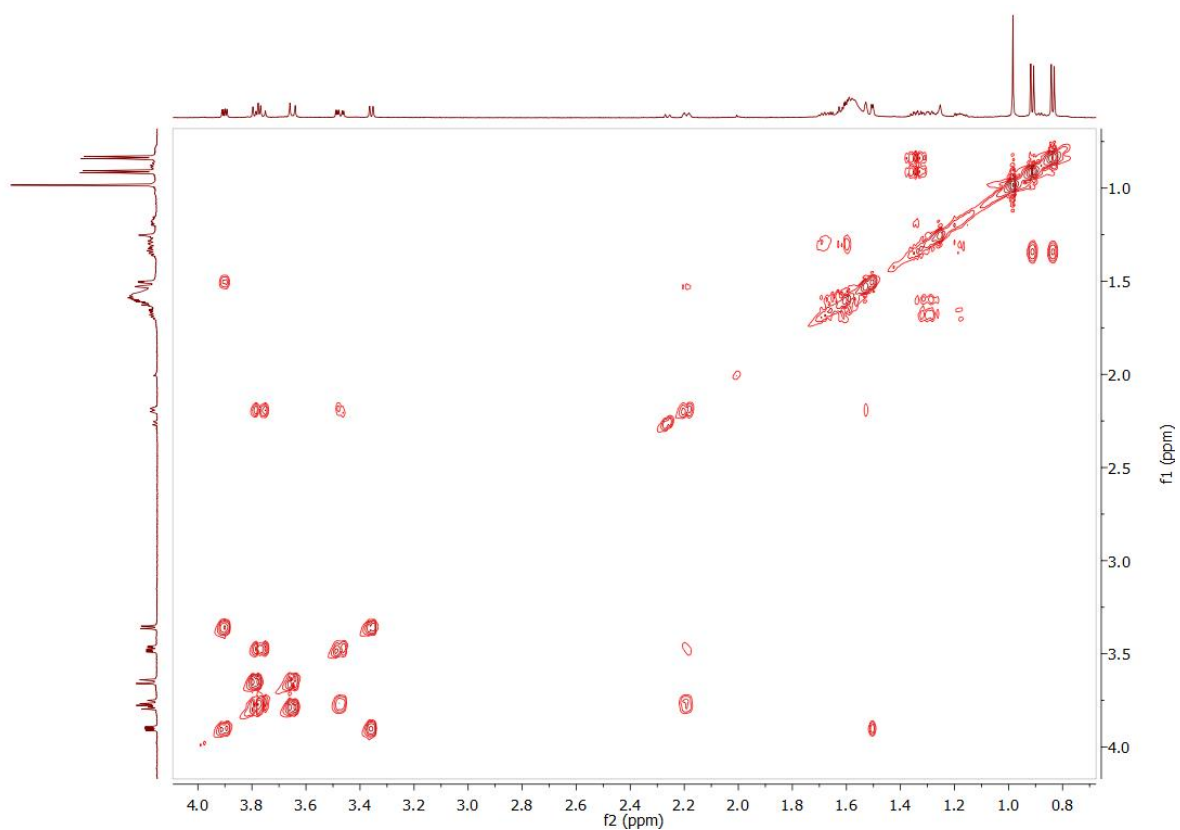

**Figure S32:**  $^1\text{H}$ - $^1\text{H}$  COSY spectrum (600 MHz) of **4** in  $\text{CDCl}_3$

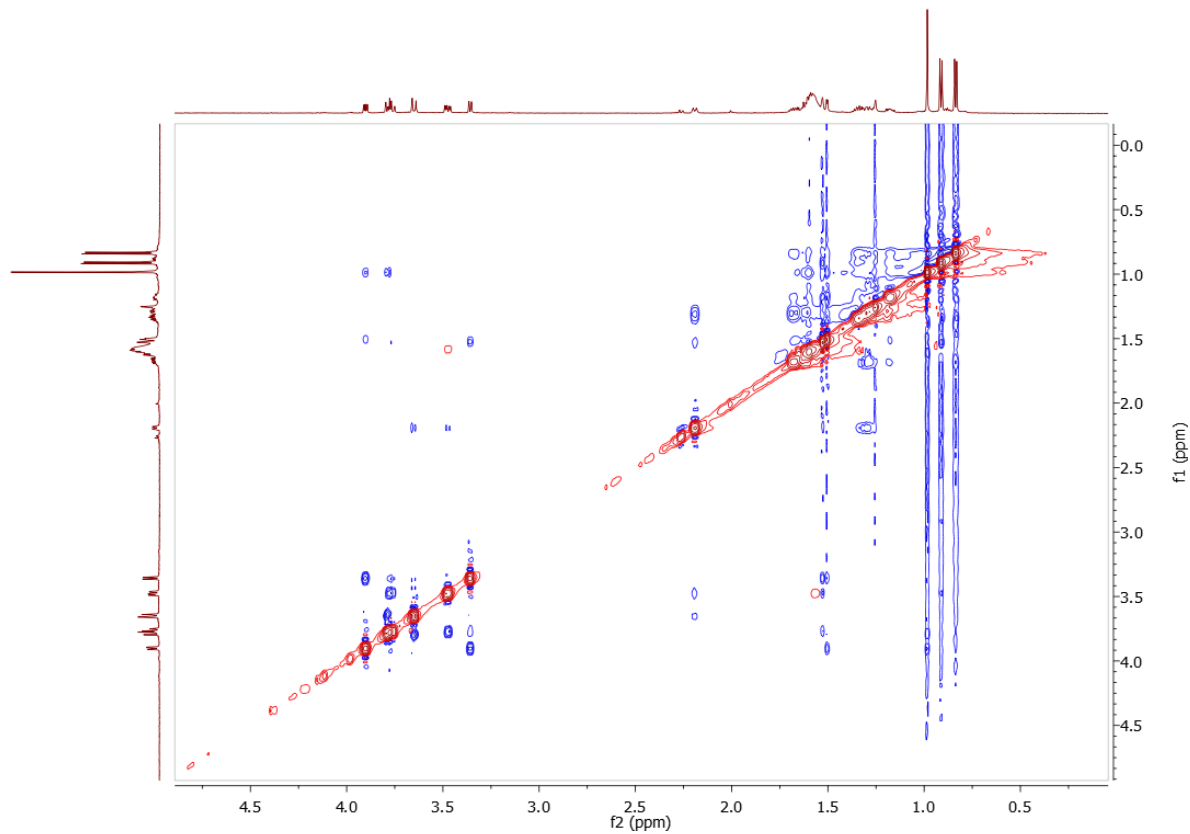

**Figure S33:** NOESY spectrum (600 MHz) of **4** in  $\text{CDCl}_3$

## Elemental Composition Report

### Single Mass Analysis

Tolerance = 10.0 PPM / DBE: min = -1.5, max = 50.0

Element prediction: Off

Number of isotope peaks used for i-FIT = 3

Monoisotopic Mass, Even Electron Ions

31 formula(e) evaluated with 1 results within limits (up to 50 best isotopic matches for each mass)

Elements Used:

C: 0-50 H: 0-50 O: 0-10

BF14-1-103-May-2019BF14-1-1

BF14-1-1

BF14-1-1\_4 10 (0.212)

1: TOF MS ES+  
1.11e+003

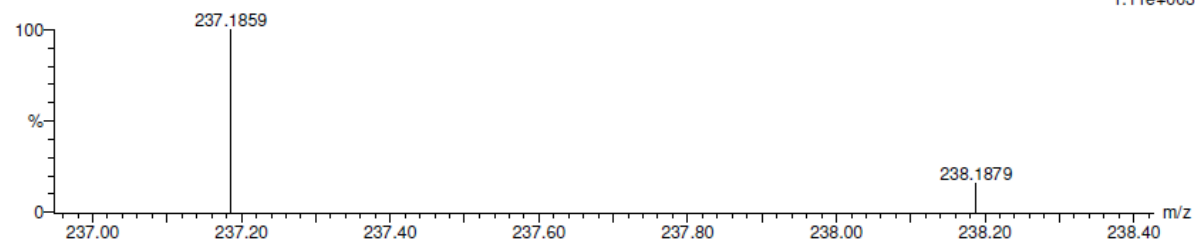

|          |            |      |     |      |       |              |         |        |
|----------|------------|------|-----|------|-------|--------------|---------|--------|
| Minimum: |            |      |     | -1.5 |       |              |         |        |
| Maximum: | 5.0        | 10.0 |     | 50.0 |       |              |         |        |
| Mass     | Calc. Mass | mDa  | PPM | DBE  | i-FIT | i-FIT (Norm) | Formula |        |
| 237.1859 | 237.1855   | 0.4  | 1.7 | 3.5  | 16.7  | 0.0          | C15     | H25 O2 |

**Figure S34:** HRESIMS spectrum of **4**

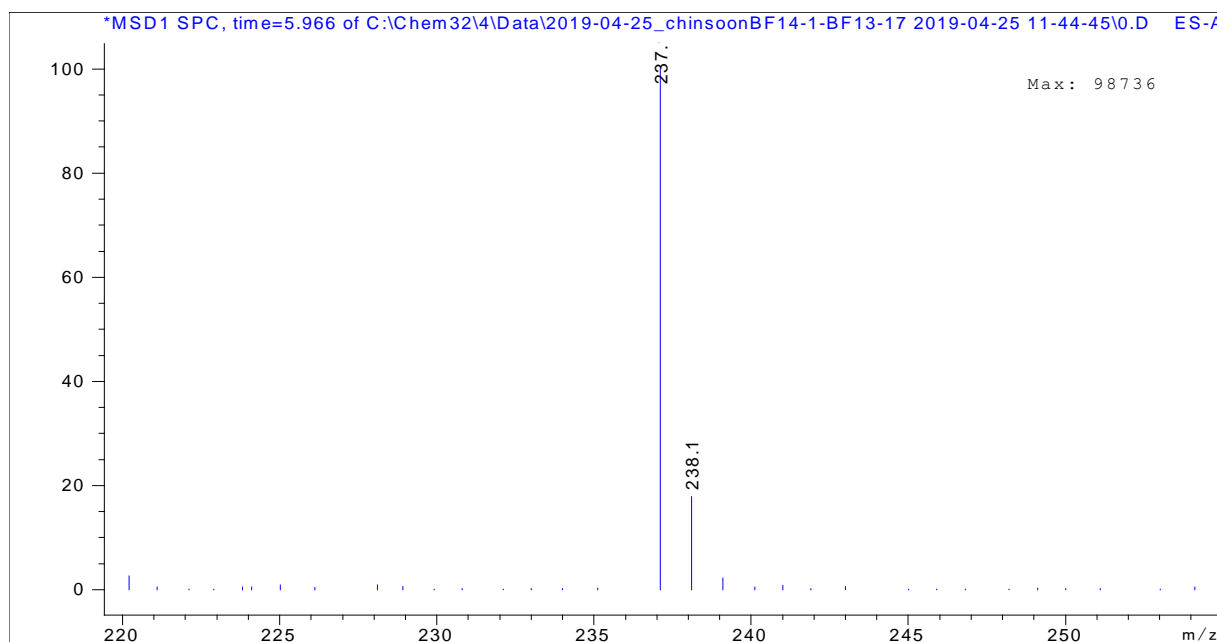

**Figure S35:** ESIMS spectrum of **4**

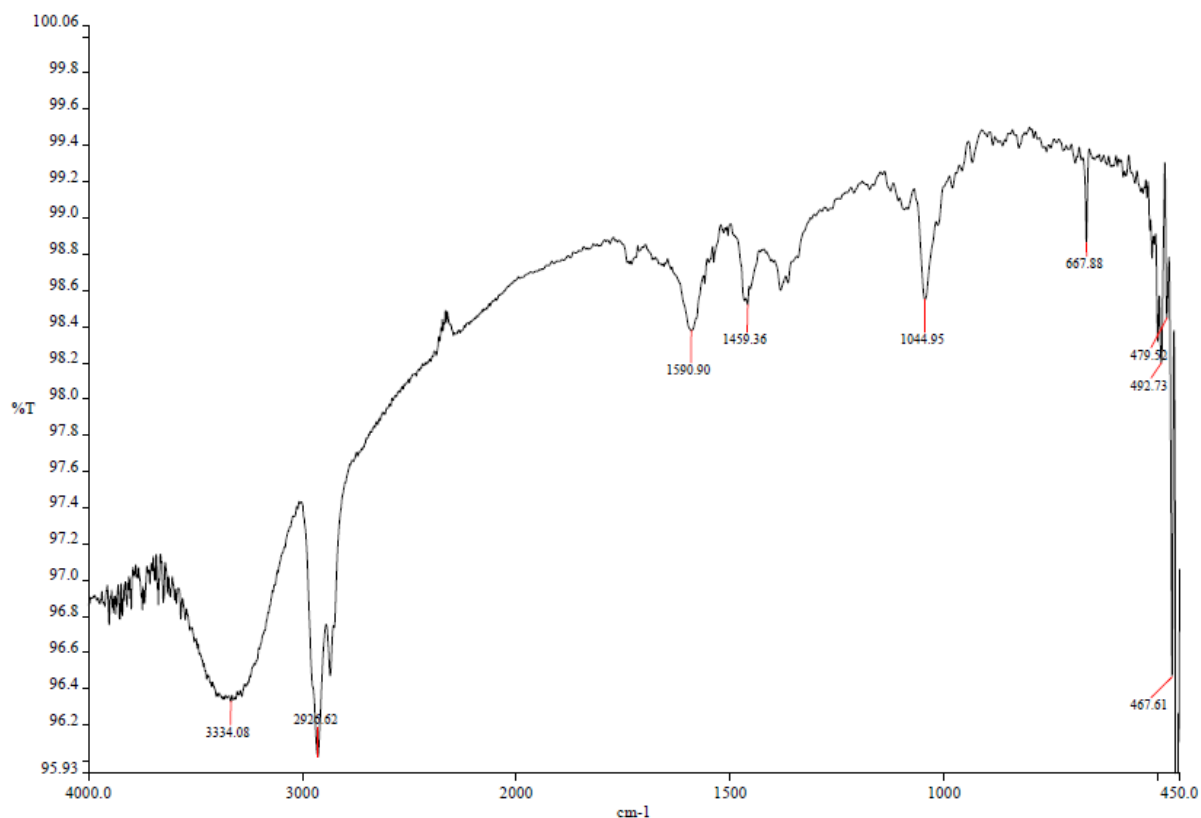

**Figure S36:** IR spectrum of **4**

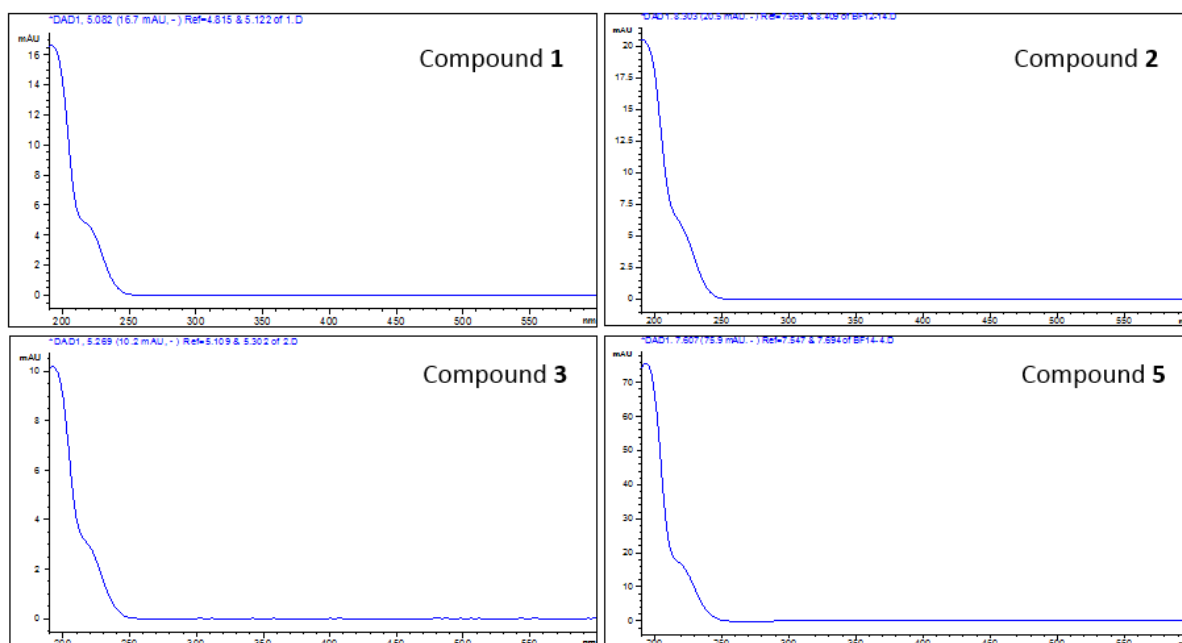

**Figure S37:** UV-vis spectrum of **1–3** and **5**

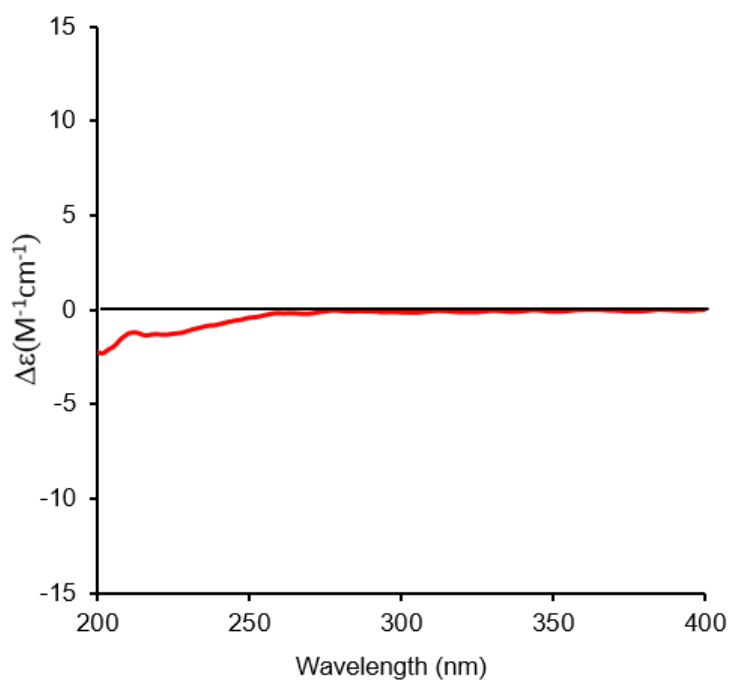

**Figure S38:** ECD spectrum of **4**

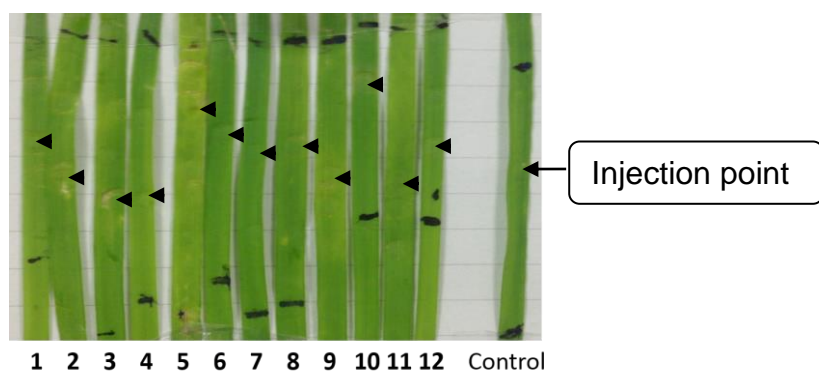

**Figure S39:** Phytotoxic activity of **1–12** against wheat leaves at 200 ppm

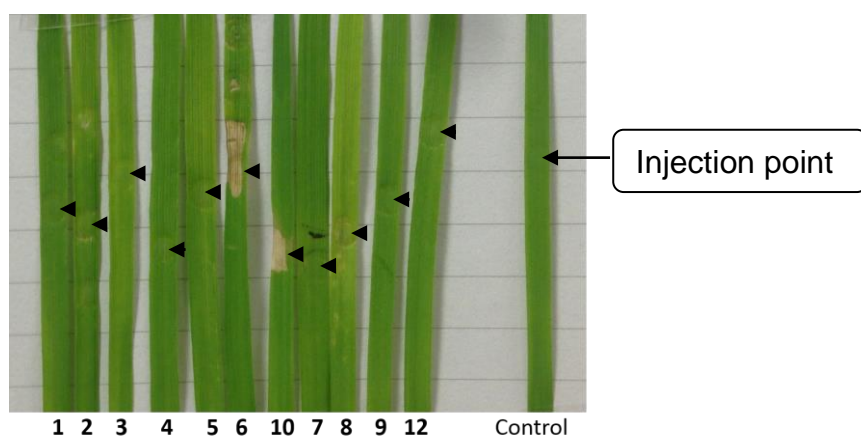

**Figure S40:** Phytotoxic activity of **1–10** and **12** against wheat leaves at 500 ppm



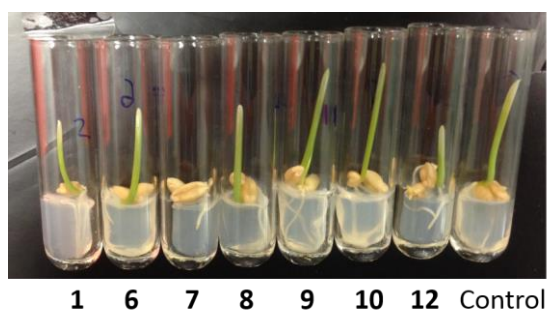

**Figure S41:** Phytotoxic activity of **1**, **6–10** and **12** against wheat germination at 100 ppm on day 5

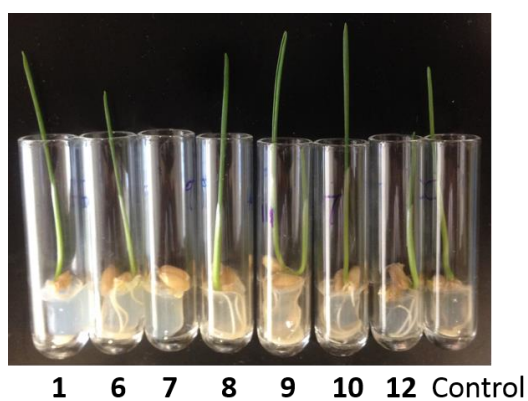

**Figure S42:** Phytotoxic activity of **1**, **6–10** and **12** against wheat germination at 100 ppm on day 7
